1 **Larval diet affects adult reproduction but not survival regardless of injury and**  
2 **infection stress in *Drosophila melanogaster***

3

4 Eevi Savola<sup>1</sup>, Pedro Vale<sup>1</sup>, Craig Walling<sup>1</sup>

5

6 1: Institute of Evolutionary Biology, School of Biological Sciences, The University of  
7 Edinburgh, Ashworth Laboratories, Edinburgh EH9 3FL, UK

8 **ABSTRACT:**

9 Early-life conditions have profound effects on many life-history traits. In particular,  
10 early-life diet affects both juvenile development, and adult survival and reproduction. Early-  
11 life diet also has consequences for the ability of adults to withstand stressors such as starvation,  
12 temperature and desiccation. However, it is less well known how early-life diet influences the  
13 ability of adults to respond to infection. Here we test whether varying the larval diet of female  
14 *Drosophila melanogaster* (through altering protein to carbohydrate ratio, P:C) influences the  
15 long-term response to injury and infection with the bacterial pathogen *Pseudomonas*  
16 *entomophila*. Given previous work manipulating adult dietary P:C, we predicted that adults  
17 from larvae raised on higher P:C diets would be more likely to survive infection and have  
18 increased reproduction, but shorter lifespans and an increased rate of ageing. For larval  
19 development, we predicted that low P:C would lead to a longer development time and lower  
20 viability. We found that early-life and lifetime egg production were highest at intermediate to  
21 high larval P:C diets, but there was no effect of larval P:C on adult survival. Larval diet had no  
22 effect on survival or reproduction post-infection. Larval development was quickest on  
23 intermediate P:C and egg-to-pupae and egg-to-adult viability were higher on higher P:C.  
24 Overall, despite larval P:C affecting several traits measured in this study, we saw no evidence  
25 that larval P:C altered the consequence of infection or injury for adult survival and early-life  
26 and lifetime reproduction. Taken together, these data suggest that larval diets appear to have a  
27 limited impact on adult response to infection.

28

29 **Key words:** larval diet, infection, injury, life-history trade-offs, *Drosophila*, *Pseudomonas*  
30 *entomophila*

## 31 INTRODUCTION:

32 Early-life conditions are important in determining many key life-history traits  
33 (reviewed in Metcalfe and Monaghan, 2001, 2003). In particular, diet in early-life has been  
34 shown to have profound effects on later life-history traits such as survival and reproduction,  
35 and poor early nutrition can have costs associated with catch-up growth in adulthood (reviewed  
36 in Metcalfe and Monaghan, 2001, 2003). Nutrition is also important for the ability of an  
37 organism to respond to a number of key environmental stresses such as infection or temperature  
38 stress, as has been demonstrated in both juveniles (e.g. Lee *et al.*, 2006; Venesky *et al.*, 2012;  
39 Kutz, Sgrò and Mirth, 2019) and adults (e.g. Peck, Babcock and Alexander, 1992; Kim, Jang  
40 and Lee, 2020; Ponton *et al.*, 2020). However, work on the effect of early-life diet on adult  
41 responses to environmental stress is much more limited (but see e.g. Andersen *et al.* 2010;  
42 Kelly and Tawes 2013; Knutie *et al.* 2017). To investigate the long-term effects of early-life  
43 diet on adult traits and infection stress resistance, here we combine multiple larval diets, apply  
44 injury and infection to the adults and measure both larval and adult life-history responses in  
45 *Drosophila melanogaster*.

46 A vast literature exists using various approaches to manipulate diet and investigate the  
47 consequences of these manipulations (reviewed in Simpson and Raubenheimer, 2012). A  
48 particularly well-investigated manipulation is adult dietary restriction (DR), the restriction of  
49 calories or a particular nutrient without malnutrition, which has been shown to increase  
50 lifespan, delay ageing and reduce reproduction across a wide range of species (e.g. Mair and  
51 Dillin, 2008; Simpson *et al.*, 2017). Recent evidence suggests that this effect is mostly driven  
52 by changes in the protein to non-protein ratio of the diet, often protein to carbohydrate (P:C)  
53 ratios, particularly in insects (e.g. Lee *et al.*, 2008; Simpson *et al.*, 2017, but see Speakman,  
54 Mitchell and Mazidi, 2016). Regarding the effects of juvenile diet on juvenile and adult traits,  
55 there have been many studies testing the effects of caloric content (e.g. May, Doroszuk and  
56 Zwaan, 2015; Adler, Telford and Bonduriansky, 2016; House *et al.*, 2016; Littlefair and Knell,  
57 2016; Hooper *et al.*, 2017; Krittika, Lenka and Yadav, 2019). As it has become clearer that  
58 macronutrient content is more important than total caloric content, recent work has shifted to  
59 testing how the macronutrient composition of the juvenile diet may affect both juvenile and  
60 adult traits (reviewed in Nestel *et al.*, 2016). However, these studies often do not consider  
61 additional stressors (but see e.g. Andersen *et al.*, 2010; Kelly and Tawes, 2013; Pascacio-  
62 Villafán *et al.*, 2016).

63 Changing juvenile diet has been shown to alter the rate and success of the  
64 developmental period in both holometabolous (reviewed in Nestel *et al.*, 2016) and  
65 hemimetabolous insects (e.g. Hunt *et al.*, 2004; Kelly and Tawes, 2013; Houslay *et al.*, 2015).  
66 In general, juveniles on higher or intermediate P:C diets have a quicker development rate and  
67 improved development success (e.g. Matavelli *et al.*, 2015; Rodrigues *et al.*, 2015; Silva-Soares  
68 *et al.*, 2017, but see Cordes *et al.*, 2015; Houslay *et al.*, 2015; Davies *et al.*, 2018; Gray,  
69 Simpson and Polak, 2018; Kim *et al.*, 2019). In holometabolous insects, larvae have to pass  
70 several size assessment thresholds for successful pupation, and it has been suggested larvae  
71 feed until they have enough resources for metamorphosis and to survive the non-feeding state  
72 of pupation (reviewed in Mirth and Riddiford, 2007; Nestel *et al.*, 2016). As amino acids from  
73 protein in the diet signal a cell cycle for growth of tissues (Britton and Edgar 1998; Colombani  
74 *et al.* 2003), and larvae do not develop on diets lacking in essential amino acids (e.g. Chang,  
75 2004), it seems that higher larval P:C diets facilitate quicker growth and accumulation of  
76 essential resources that allow successful development into adulthood. There may be an upper  
77 limit after which increasing P:C has detrimental effects, potentially due to toxic effects of  
78 protein metabolism (Fanson *et al.* 2012), for example the accumulation of toxic wastes in food  
79 (reviewed in Simpson and Raubenheimer, 2009) or the highest P:C diets being limiting in  
80 carbohydrates, but the exact reasons are currently unknown.

81 Early-life diet has also been shown to have important consequences for many adult life-  
82 history traits, including reproduction, lifespan and ageing (reviewed in Metcalfe and  
83 Monaghan, 2001). In insects, measures of both early-life and lifetime egg production peak on  
84 higher or intermediate larval P:C diets (e.g. Rodrigues *et al.*, 2015; Silva-Soares *et al.*, 2017;  
85 Duxbury and Chapman, 2019, but see Matavelli *et al.*, 2015). For lifespan, results of early-life  
86 dietary manipulation in insects are mixed, with lifespan being maximised at different P:C  
87 levels, and even no effect of P:C depending on the study (e.g. Runagall-McNaull,  
88 Bonduriansky and Crean, 2015; Stefana *et al.*, 2017; Davies *et al.*, 2018; Duxbury and  
89 Chapman, 2019). Indeed, a recent meta-analysis showed no consistent effect of early-life diet  
90 on adult lifespan across taxa (English and Uller 2016). The age-related decline in various traits  
91 may also be altered by larval diet, however the direction of the effect is again unclear, with  
92 higher P:C or calorie diets leading to quicker, slower or having no effect on ageing (Tu and  
93 Tatar 2003; May *et al.* 2015; Adler *et al.* 2016; Hooper *et al.* 2017). The effect of larval diet on  
94 adult reproduction may be a result of adults being able to use nutrient stores of, for example,  
95 protein or lipids in body tissues, including the fat body and haemolymph (reviewed in Boggs,  
96 2009; Nestel *et al.*, 2016). However, it is less clear how these stored resources could affect

97 lifespan. Potential explanations for inconsistencies in results across studies and life-history  
98 traits include that stored nutrients may trade-off between different adult life-history traits in an  
99 environment or species-specific manner, that juvenile diet effects may be dependent on adult  
100 food environment, or that storage of nutrients can be re-allocated in adulthood, for example by  
101 reabsorption of flight muscles (reviewed in Boggs, 2009; Nestel *et al.*, 2016). Overall, it seems  
102 that increasing P:C in the larval diet increases reproduction and juvenile diet often has effects  
103 on adult lifespan, but the directionality of the effects are inconsistent.

104         Despite the wealth of information on how larval diet affects multiple adult traits, studies  
105 focusing on adult stress resistance are rarer, despite the likelihood that stress resistance is a key  
106 trait in natural populations (e.g. Hoffman and Hercus, 2000; Van Voorhies, Fuchs and Thomas,  
107 2005; Kawasaki *et al.*, 2008; Adamo, 2020). Some data exist on a small number of  
108 environmental stressors including temperature, desiccation and starvation (Andersen *et al.*  
109 2010; Pascacio-Villafán *et al.* 2016; Davies *et al.* 2018), however the direction of effects are  
110 often mixed and potentially stress-specific. Particularly poorly studied is the effect of larval  
111 diet on adult infection response. In *Anopheles gambiae*, melanising ability decreased with  
112 severity of larval calorie restriction (Suwanchaichinda and Paskewitz 1998). Female *Gryllus*  
113 *texensis* crickets on lower P:C as nymphs and adults survive better over five days post-infection  
114 (Kelly and Tawes 2013). As this study changed both adult and larval diet, it is not possible to  
115 disentangle the effect of larval diet alone. Without a direct immune stress, there is evidence for  
116 differential adult response to immune challenge due to larval diet. For example, the production  
117 of antimicrobial peptides (AMPs) decreased with lower larval P:C in *D. melanogaster* (Fellous  
118 and Lazzaro 2010). For other immune response measures, in *Lestes viridis* damselflies, lower  
119 calories and starvation led to reduced phenoloxidase (PO) activity and haemocyte  
120 numbers/levels in adults (Rolff *et al.* 2004; De Block and Stoks 2008). However, to our  
121 knowledge, no study to date has tested the effect of larval dietary P:C on adult life-history traits  
122 when exposed to infection or injury stress.

123         Several hypotheses have been put forward to explain the effect of larval diet on adult  
124 survival post-infection. These include increased stress response capability due to overall better  
125 body condition, and increased investment into immunity, either through the growth of specific  
126 tissues, or through increased availability of limiting nutrients (Fellous and Lazzaro 2010). The  
127 first suggestion is supported by studies where both immune response and body condition are  
128 lower with starvation (Suwanchaichinda and Paskewitz 1998; Rolff *et al.* 2004), but the  
129 independent effects are difficult to separate (Fellous and Lazzaro 2010). The second hypothesis

130 is supported by studies where indicators of immune response increase in adults or pupae outside  
131 of effects on general body condition with a diet higher in P:C in *D. melanogaster* (Fellous and  
132 Lazzaro 2010) or plant diets of worse quality in *Epirrita autumnata* moths (Klemola et al.  
133 2007). In general protein seems to be an important nutrient in relation to survival post-infection  
134 (e.g. Lee *et al.*, 2006; Povey *et al.*, 2009, 2014; Cotter *et al.*, 2011, 2019; Savola *et al.*, 2020),  
135 suggesting individuals developing on higher larval P:C diets should have improved resistance  
136 to infection.

137 To test the effects of larval P:C on larval and adult life-history and adult survival post-  
138 infection, we reared larvae on various P:C diets and exposed female adults to injury and  
139 infection stress (with a bacterial pathogen, *Pseudomonas entomophila*). For the larvae, we  
140 measured development time to adulthood and measures of viability (egg-to-pupae, egg-to-adult  
141 and pupae-to-adult viability). For the adults, we measured the key life-history traits of survival  
142 and reproduction. We predicted that low P:C larval food would lead to longer development  
143 time and lower viability across all stages. If larval diet affects adult life-history traits  
144 independent of adult food, we predicted a similar effect to that observed when P:C ratio is  
145 manipulated in adults (e.g. Lee *et al.*, 2008; Jensen *et al.*, 2015; Savola *et al.*, 2020), with low  
146 larval P:C extending lifespan, and reducing reproduction and the senescent decline in egg  
147 laying. Conversely, if larval diet has no long-term effects on life-history traits, we would expect  
148 to see similar survival and reproduction patterns across all diets. As low P:C diets have been  
149 found to be especially detrimental for survival post-infection in our host-pathogen system  
150 (Savola et al. 2020), we predicted that low larval P:C would reduce survival and reproduction  
151 to a greater extent in injured and infected flies than in control flies.

152 **METHODS:**

153 *LARVAL DIETS:*

154 Larval diets consisted of five diets varying in P:C composition from 1:16 to 2:1 P:C  
155 (corresponding to 5 to 61% protein content, Table S1) based on a modified version of Lewis  
156 food (Lewis, 1960, Table S1). These diets are a subset of ten diets used in an earlier study  
157 (Savola et al. 2020).

158 *LARVAL EXPERIMENTAL METHODS:*

159 *D. melanogaster* experimental individuals were from an outcross DGRP population  
160 established from 100 pairwise crosses of 113 lines from the *Drosophila* genetic reference panel  
161 (DGRP) (Mackay et al. 2012) (see methods and supplementary material in Savola *et al.*, 2020).  
162 From the 35<sup>th</sup> generation, we pipetted 5  $\mu$ l of egg solution into each larval diet vial (following  
163 Clancy and Kennington, 2001) to establish density controlled groups of eggs (on average 50  
164 ( $\pm$  19) eggs). The mean volume of food in vials was 7.66 ( $\pm$  0.58) ml. 30 vials of each diet were  
165 prepared in this way, and an additional 21 of the lowest P:C diet to ensure enough adults for  
166 adult collection. Due to very low egg counts in a small number of vials, a further 5-10  $\mu$ l was  
167 added to these vials (17/171 vials, approximately 10%). For each vial, eggs were counted twice  
168 under a microscope to get an average egg count. Starting from experimental day 1 (one day  
169 after adding eggs to diets), vials were inspected daily for adult eclosion and the total number  
170 of adults eclosed per vial was recorded. The number of pupae per vial was counted once all  
171 adults had eclosed, based on pupal cases and undeveloped pupae.

172 *ADULT COLLECTION:*

173 Eclosion began on experimental day 8, from which point onwards adults were counted  
174 and removed from vials twice a day, in the morning and evening. Pilot data suggested different  
175 development times on the different diets, and therefore for each diet adults were collected  
176 primarily across three days per diet, starting one day after adult eclosion began (Figure S1). In  
177 this way, adult females were collected across a total of six days across all diet treatments to  
178 create six blocks. Some diets with quicker development times required some adults to be  
179 collected on the fourth day to achieve sufficient sample sizes (Figure S1 and Table S2; sample  
180 sizes = 18 to 40 adult flies per larval diet and stress treatment).

181 After adult collection, all flies were placed singly in vials containing standard Lewis  
182 medium in our laboratory, corresponding to the 1:6 P:C diet (Table S1, 14% protein diet), and

183 were maintained on this diet for their remaining lifespan. Trays were rotated in the incubators  
184 daily to minimise microclimate effects. The day following adult collection, each female was  
185 provided with an age-matched male from the same outcross DGPR population. The female was  
186 left with the male for 24 hours to allow mating, following which the male was removed.

#### 187 *STRESS TREATMENTS:*

188 On the seventh day post-eclosion for each block, female flies were exposed to one of  
189 three stress treatments: unstressed control, injury, and infection with a bacterial pathogen  
190 *Pseudomonas entomophila*. Treatments for each block were done at the same time each day  
191 (around 14:00) to minimise time-of-day effects on immunity (e.g. Lee and Edery, 2008). After  
192 stress treatments, the fly was placed into a new vial containing modified Lewis medium (Lewis,  
193 1960, see P:C 1:6 diet in Table S1). The stress treatments were applied following Savola *et al.*,  
194 (2020, modified from Dieppois *et al.*, 2015; Troha and Buchon, 2019), with the overnight *P.*  
195 *entomophila* bacterial solution re-suspended in 30 ml Luria-Bertani (LB) medium in the  
196 morning and left to grow for three hours prior to dilution from a known OD value to correspond  
197 to an OD value of 0.001. This level was chosen from a pilot study (Figure S2) and is slightly  
198 lower than a previous experiment in adults (Savola *et al.* 2020), as the diluted OD of 0.005 had  
199 much lower survival compared to the previous experiment. Each block's bacterial culture was  
200 established from a set of isogenic bacterial cultures grown overnight in LB medium, aliquoted  
201 in 20-25% glycerol 200  $\mu$ l quantities and stored at -80°C. A subset of flies from each block of  
202 infections were plated on *Pseudomonas* isolating agar to confirm the infection treatments were  
203 successful (following Gupta *et al.*, 2017, see supplementary information).

#### 204 *ADULT TRAIT MEASUREMENTS:*

205 The number of eggs a female laid was counted from day 2 onwards for each block. For  
206 the first 14 days, eggs were counted daily and females were tipped into new vials.  
207 Subsequently, egg counts were performed every second day and stopped on day 98 for  
208 logistical reasons. This is an accurate proxy for lifetime egg production, as females in our  
209 previous experiment with adult P:C diet manipulation laid on average 99.37% ( $\pm$  2.34%) of  
210 their lifetime eggs by day 98 (Savola *et al.* 2020). If a fly died on a day when eggs were not  
211 counted, an extra egg count was performed on the day of death. Survival was checked daily.

#### 212 *STATISTICAL METHODS:*

213 The data were analysed using R software, version 3.5.2 (R Core Team 2014). All graphs  
214 were drawn using ggplot2 (Wickham 2016). All traits were analysed using generalised linear



215 mixed models (GLMM). Models using a Poisson distribution were checked for zero inflation  
216 and overdispersion using the *DHARMA* package (Hartig 2019). In all models, even though we  
217 altered the P:C ratio of diets, diet was analysed as a continuous covariate as the percentage of  
218 protein in the diet (Table S1). To allow for non-linear effects, the quadratic term of protein  
219 percentage was also included. To avoid scaling errors, all continuous covariates were  
220 standardised to a mean of zero and a standard deviation of one. This was done separately for  
221 each test due to different sample sizes for different measures. Stress treatment was analysed as  
222 a categorical fixed effect. For all models with two-, or three-way interactions, for displaying  
223 summaries of LRT results of main effects or two-way interactions, parameter estimates and  
224 associated standard deviations are from separate models not including the associated two-, or  
225 three-way interactions. All model prediction plots were made with all random effects set to 1  
226 and diets are shown as the percentage of protein in the diet.

227 We analysed survival to a number of developmental stages: egg-to-pupa, pupa-to-adult  
228 and egg-to-adult using linear models assuming a Gaussian distribution. For egg-to-pupa and  
229 egg-to-adult survival, we included the number of eggs in each vial as a covariate to control for  
230 differences in initial egg number on how many pupae or adults developed in each vial. This is  
231 essentially the same as modelling viability as percentages or as a proportion, which is often  
232 done in other larval diet studies (e.g. Andersen *et al.*, 2010; Sentinella, Crean and  
233 Bonduriansky, 2013; Kutz, Sgrò and Mirth, 2019), however our method does not bound the  
234 data at 100% or 1. Similarly, for egg-to-pupa survival, we included the number of pupae in  
235 each vial as a covariate. All models were visually analysed for normality. Development time  
236 was analysed through GLMM with a Poisson error distribution using the *lme4* R package  
237 (Bates *et al.* 2015) with the “bobyqa” optimiser with 100’000 iterations. We included vial as a  
238 random effect to account for any within vial effects, for example different larval densities and  
239 repeated measurements. For clarity of presentation, model predictions were made at either the  
240 average number of eggs or pupae per vial.

241 For adult survival, Kaplan-Meier survival curves were made using the *survminer* R  
242 package (Kassambara and Kosinski 2018) with diet as a factor. As our data did not conform to  
243 the assumptions of proportional hazards (global term of *cox.zph* function  $\text{Chisq} = 54.98$ ,  $p =$   
244  $<0.001$ ), we used an event history model following Moatt *et al.* (2019; Savola *et al.* 2020),  
245 implemented through a binomial GLMM in the *lme4* R package (Bates *et al.* 2015) with the  
246 “bobyqa” optimiser with 100’000 iterations. This model is similar to the Cox proportional  
247 hazards model, however the results in this case estimate a per day mortality risk, which we will

248 refer to as mortality. Individuals in the dataset were scored daily as 0 for alive and once as 1  
249 for dead. The model included day as a random effect to account for differences in survival  
250 between days, and individual ID to account for multiple measures of an individual. To confirm  
251 the results of the survival model, we further analysed the data as lifespan using a GLMM in the  
252 package glmmTMB (Brooks et al. 2017) with a negative binomial distribution and block as a  
253 random effect to account for differences between infection days. Even though the data do not  
254 conform to the Cox proportional hazards assumptions, we checked for consistency with the  
255 result of the above analysis using a Cox proportional hazards model in the R Survival package  
256 (Therneau 2015).

257         For reproduction, various measures were analysed. As adult diet might have an  
258 increasing influence on the number of eggs produced as flies get older, for example due to  
259 compensatory feeding, we analysed measures of early-life egg production. We ran separate  
260 analyses on the number of eggs produced prior to stress treatments, seven days in total, and  
261 eggs produced in the seven days post stress treatments to test for early-life differences in  
262 reproduction and if these were affected by stress treatment. Only flies left alive on the last day  
263 of egg counts were included in these analyses. These data were analysed using a GLMM with  
264 a negative binomial distribution and including a zero-inflation term with the glmmTMB R  
265 package (Brooks et al. 2017). Lifetime egg production (to day 98) was analysed with an  
266 identical model to the other reproduction models with all flies included, with an additional  
267 model including lifespan as a predictor. Mean centered lifespan was included to account for  
268 selective disappearance and block was included as a random effect. To analyse daily egg  
269 production, all egg counts corresponding for a span of two days were divided by two and  
270 rounded down to the nearest integer to match earlier daily egg counts. Daily egg production  
271 was analysed using a GLMM with negative binomial distribution and including a zero-inflation  
272 term. As well as the fixed effects described above, age was included as a linear and non-linear  
273 term as well as the interactions between these and all other fixed effects. Individual ID and  
274 block were included as random effects.

275 **RESULTS:**

276 *EFFECTS OF LARVAL NUTRITION ON LARVAL TRAITS:*

277 P:C of the larval diet had a significant effect on how many individuals developed from  
278 eggs to adults, where larvae reared on higher P:C were more likely to develop to adults (Figure  
279 1A & Figure S3A; Table S3A; Protein = 2.20 ( $\pm$  0.55),  $F = 15.90$ ,  $p = <0.001$ ). With higher  
280 numbers of eggs in a vial, more adults developed (Table S3A; Average number of eggs = 0.72  
281 ( $\pm$  0.03),  $F = 762.19$ ,  $p = <0.001$ ). Separating this result into effects on larval and pupal  
282 viability, there was a significant effect of P:C on the numbers of eggs developing into pupae  
283 (Figure 1B & Figure S3B; Table S3A; Protein = 1.79 ( $\pm$  0.52),  $F = 9.13$ ,  $p = 0.003$ ; Average  
284 number of eggs = 0.86 ( $\pm$  0.03),  $F = 1165.5$ ,  $p = <0.001$ ). There was a marginally non-  
285 significant effect of P:C on the number of adults developing from pupae (Figure 1C & Figure  
286 S3C; Table S3C; Protein = 0.70 ( $\pm$  0.45),  $F = 3.81$ ,  $p = 0.052$ ). As expected, with more pupae  
287 in a vial, more adults developed (Figure 1C & Figure S3C; Table S3C; Pupae = 0.82 ( $\pm$  0.02),  
288  $F = 1228.5$ ,  $p = <0.001$ ).

289 P:C in the larval diet also had an effect on the development time to adulthood, with  
290 higher larval P:C resulting in shorter development time (Figure 1D & Figure S4, Table S3;  
291 Protein = -0.22 ( $\pm$  0.01), Chi-squared = 191.75,  $p = <0.001$ ). This relationship is quadratic,  
292 suggesting that intermediate P:C diets had a quicker development time in comparison to the  
293 high or low P:C diets, or that the rate of reduction in development time plateaued at the highest  
294 P:C diets (Figure 1D & Figure S4, Table S4; Protein<sup>2</sup> = 0.16 ( $\pm$  0.01), Chi-squared = 183.61,  $p$   
295 =  $<0.001$ ). Vials with higher average number of eggs had a slightly longer development time  
296 (Table S4; Average number of eggs = 0.03 ( $\pm$  0.01), Chi-squared = 26.80,  $p = <0.001$ ).

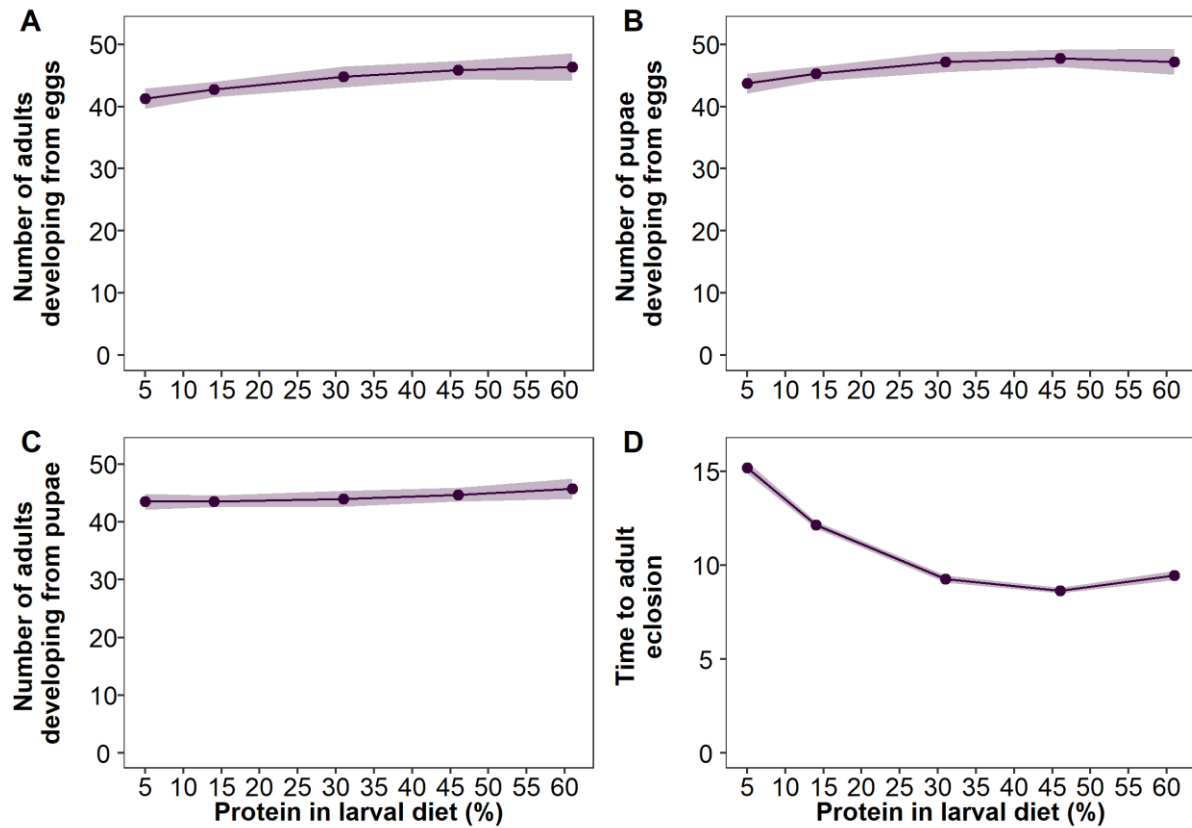

297

298 **Figure 1:** Model predictions of the effects of larval P:C (shown as the corresponding  
299 percentage of protein) on various larval traits: (A) the number of adults developing having  
300 controlled for the number of eggs laid ( $50 (\pm 19)$  eggs on average); (B) the number of pupae  
301 eclosing having controlled for the number of eggs laid ( $50 (\pm 19)$  eggs on average); (C) the  
302 number of adults developing having controlled for the number of pupae formed ( $46 (\pm 18)$   
303 pupae on average); and (D) the average time taken for adult eclosion. All predictions are based  
304 on either vials starting with the overall mean number of eggs ( $50 (\pm 19)$  eggs) (A, B, D), or the  
305 overall mean number of pupae ( $46 (\pm 18)$  pupae) (C). Shaded areas are 95% confidence  
306 intervals. Protein and protein<sup>2</sup> are mean centered to standard deviation of 1. See S3 for viability  
307 data as percentages.

308 *EFFECTS OF LARVAL NUTRITION ON ADULT TRAITS AND SURVIVAL AFTER STRESS:*

309 P:C of larval diet had no effect on adult mortality regardless of stress treatment (Figure  
310 2B & Figure S5; Table S5 & Table S6). Stress treatment had a significant effect on mortality,  
311 where infected flies had a higher risk of death (Figure 2B & Figure S5; Table S5; Treatment  
312 Chi-squared = 76.67,  $p < 0.001$ ; Infection = 1.18 ( $\pm 0.13$ ); Injury = 0.24 ( $\pm 0.17$ )). Analysing  
313 the survival data as lifespan, the same patterns were observed, where stress treatment had a  
314 significant effect on lifespan, with infected flies having shorter lifespans (Figure S6 & Figure  
315 S7; Table S7 & Table S8; Treatment Chi-squared = 99.28,  $p < 0.001$ ; Infection = -1.00 ( $\pm$   
316 0.10); Injury = -0.10 ( $\pm 0.10$ )). The results of a Cox proportional hazards model show the same  
317 patterns (Figure S8; Table S9).

318 Larval P:C had a significant effect on early-life egg production prior to stress  
319 treatments, where increasing larval P:C increased early-life egg production which then levelled  
320 off at very high P:C diets (Figure 2B & Figure S11; Table S14; Protein = -0.29 ( $\pm 0.06$ ), chi-  
321 squared = 3.71,  $p = 0.054$ ; Protein<sup>2</sup> = -0.20 ( $\pm 0.04$ ),  $p < 0.001$ ). There were no significant  
322 effects of larval diet or stress treatments on egg production in the seven days following stress  
323 treatments (Figure 2C & Figure S12; Table S15 & Table S16).

324 The effect of larval P:C on lifetime egg production was similar to the effect on early-  
325 life reproduction, where increasing P:C in the larval diet increased lifetime egg production  
326 (Figure 2D & Figure S9; Table S10; Protein = 0.11 ( $\pm 0.05$ ), Chi-squared = 5.73,  $p = 0.02$ ).  
327 The effect of P:C was non-linear (Figure 2D; Table S10; Protein<sup>2</sup> = -0.11 ( $\pm 0.04$ ), Chi-squared  
328 = 8.01,  $p = 0.005$ ), with egg production reaching a peak at intermediate P:C and not increasing  
329 further at higher P:C. Stress treatment had a significant effect on lifetime egg production, where  
330 infected flies produced fewer eggs (Figure 2D; Figure S9; Table S10; Treatment chi-squared =  
331 8.81,  $p = 0.01$ ; Infection = -0.18, ( $\pm 0.08$ ); Injury = 0.04 ( $\pm 0.07$ )). Flies produced more eggs  
332 with longer lifespan (Table S11, Lifespan = 0.69 ( $\pm 0.04$ ), Chi-squared = 275.77,  $p < 0.001$ ).  
333 There was no significant interaction between larval P:C and stress treatment (Table S11). A  
334 model not accounting for lifespan showed the same pattern with stress treatments having a  
335 significant effect on egg production, where infected individuals produced fewer eggs (Figure  
336 S10; Table S12 & Table S13; Stress treatment chi-squared = 80.68,  $p < 0.001$ ; Infection = -  
337 0.82 ( $\pm 0.09$ ); Injury = -0.04 ( $\pm 0.09$ )). Increasing larval P:C resulted in higher lifetime egg  
338 production, however this pattern was not quadratic (Figure S10; Table S12 & Table S13;  
339 Protein = 0.12 ( $\pm 0.04$ ), Chi-squared = 5.91,  $p = 0.02$ ; Protein<sup>2</sup> = 0.07 ( $\pm 0.05$ ), Chi squared =

340 2.10,  $p = 0.15$ ). Even though the models differ slightly, the P:C patterns are broadly similar for  
341 both models, where egg production plateaus at the highest P:C level, as also seen in the raw  
342 data (Figure 2D, S9 & S10).

343 In general, flies across all larval diets and stress treatments showed similar patterns in  
344 egg laying over their lifespan (Figure 2E & Figure S13). Egg production was highest early in  
345 life and then declined (Figure 2E & Figure S13). At mean centered P:C and lifespan, there was  
346 a slowing in the rate of decline of egg laying with age, such that the rate of decline is high when  
347 young and slows as flies get older (Table S17 & Table S19; Age =  $-0.60 (\pm 0.03)$ , chi-squared  
348 = 2175.5,  $p < 0.001$ ; Age<sup>2</sup> =  $-0.03 (\pm 0.02)$ , chi-squared = 26.14,  $p < 0.001$ ). As with lifetime  
349 egg production, there was a significant non-linear effect of P:C, with intermediate P:C diets  
350 resulting in higher daily egg production in the control stress treatment at mean age and lifespan  
351 (Figure S13; Table S17 & Table S19; Protein<sup>2</sup> =  $-0.05 (\pm 0.05)$ , chi-squared = 12.26,  $p =$   
352  $0.0005$ ). Lifespan had no effect on daily egg production (Table S19, Lifespan =  $0.02 (\pm 0.02)$ ,  
353  $p = 0.16$ ).

354 The pattern of ageing in reproduction was broadly similar across larval diets and adult  
355 stress treatments (Figure 2E & Figure S13). However, there were some significant two-, and  
356 three-way interactions, which indicate small differences in the pattern of reproductive ageing  
357 across diets and stress treatments. There was a significant two-way interaction between P:C  
358 and the linear and quadratic effect of age, suggesting that with higher P:C, ageing in egg  
359 production was quicker and the linear effect of age was highest at intermediate P:C diets  
360 (Figure S13; Table S18 & Table S19; Protein:Age =  $-0.10 (\pm 0.02)$ , chi-squared = 30.48,  $p =$   
361  $< 0.001$ ; Protein:Age<sup>2</sup> =  $0.10 (\pm 0.02)$ , chi-squared = 23.94,  $p = < 0.001$ ). There was also a  
362 significant two-way interaction between age and the quadratic effect of P:C, suggesting that  
363 the rate of ageing was highest at intermediate P:C (Figure S13; Table S18 & Table S19;  
364 Protein<sup>2</sup>:Age =  $0.12 (\pm 0.02)$ , chi-squared = 22.62,  $p = < 0.001$ ). Stress treatments had  
365 significant effects on these two-way interactions (Figure 2E & Figure S13; Table S19,  
366 Treatment:Protein:Age<sup>2</sup> chi-squared = 14.41,  $p = 0.001$ , Treatment:Protein<sup>2</sup>:Age chi-squared =  
367 11.21,  $p = 0.004$ ), where in injured flies these terms were smaller compared to the control  
368 individuals (Table S19; Injury:Protein:Age<sup>2</sup> =  $-0.08 (\pm 0.03)$ ; Injury:Protein<sup>2</sup>:Age =  $-0.10 (\pm$   
369  $0.03)$ ). This suggests that there was less of an effect of P:C on aging in the injured flies. Stress  
370 treatment also had a significant effect on ageing, where infected flies had a more negative  
371 decline in egg laying with age than control individuals (Figure 2E & Figure S13; Table S19;  
372 Treatment:Age chi-squared = 18.05,  $p < 0.001$ ; Infection:Age =  $-0.25 (\pm 0.06)$ ).

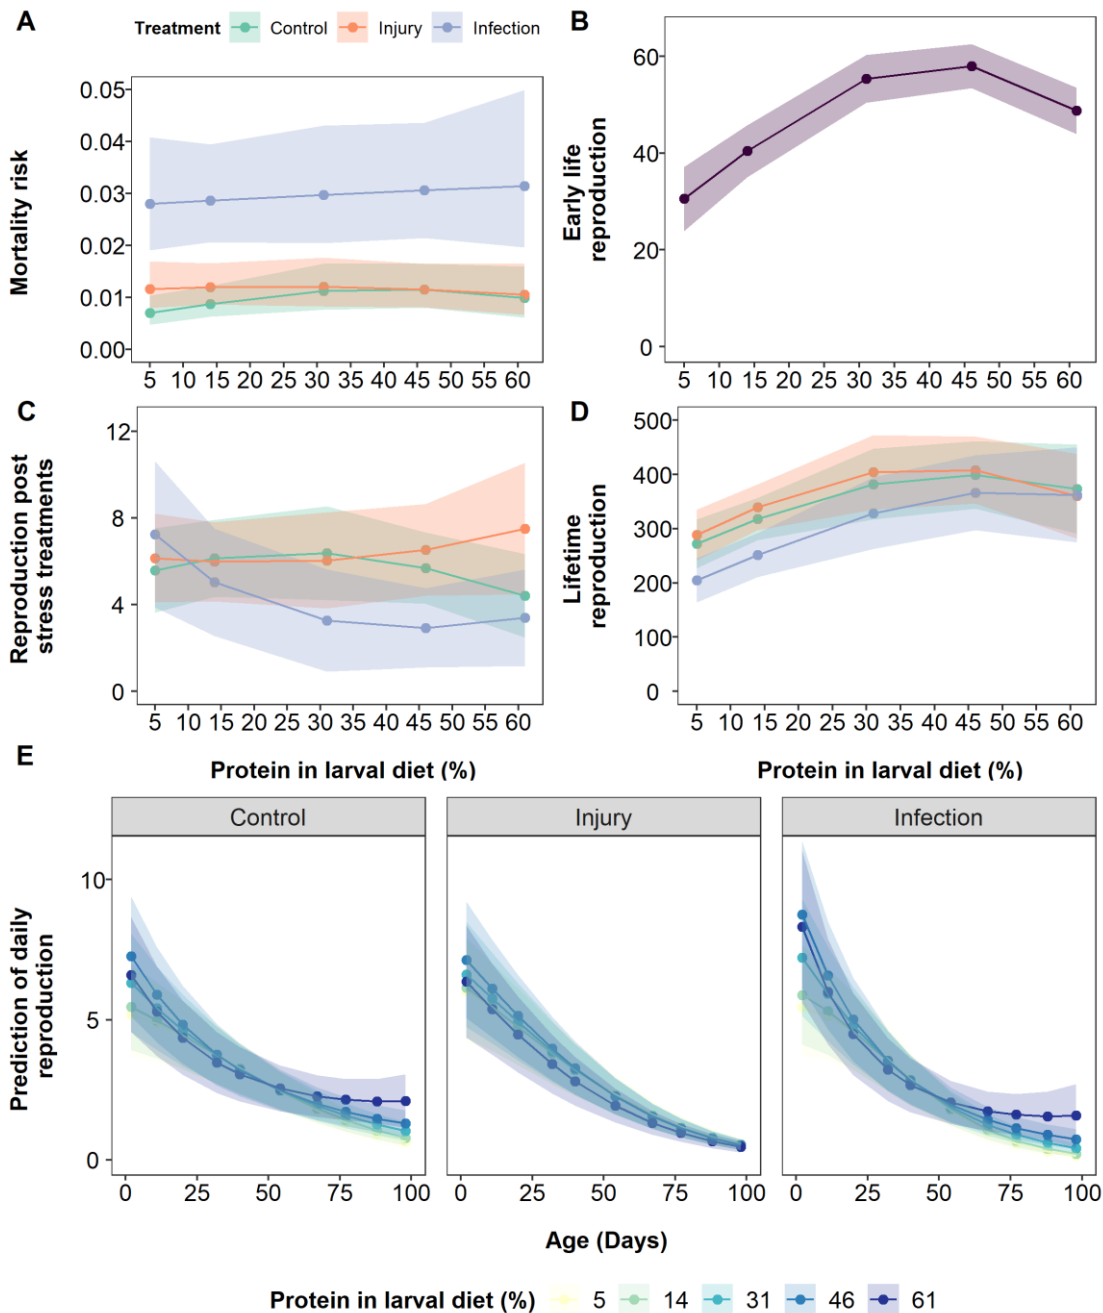

373  
 374 **Figure 2:** Model predictions of the effects of larval diet P:C (shown as the corresponding  
 375 percentage of protein) and adult stress treatment on various adult life-history traits: (A) per day  
 376 mortality risk; (B) egg production in the first 7 days of adulthood (prior to stress treatments);  
 377 (C) egg production across the 7 days after stress treatments; (D) lifetime egg production (up to  
 378 day 98); (E) reproductive ageing in terms of daily egg production. Adult flies were infected  
 379 with a bacterial pathogen (blue data points and lines in A, C, D), injured by a pinprick (orange  
 380 data points and lines in A, C, D) or with no treatment (green data points and lines in A, C, D).  
 381 Lifespan is accounted in the model to account for selective disappearance in (D). Shaded areas  
 382 are 95% confidence intervals. Protein and protein<sup>2</sup> (A-E), and age and age<sup>2</sup> (E) are mean  
 383 centered to standard deviation of 1.

## 384 **DISCUSSION:**

385       The main objective of our study was to test whether larval diets ranging in P:C content  
386 affected adult survival post-infection. We predicted that adults that developed on lower P:C  
387 diets would have worse survival post-infection, due to the demonstrated importance of dietary  
388 protein for the response to infection (e.g. Lee *et al.*, 2006; Povey *et al.*, 2009; Cotter *et al.*,  
389 2019; Savola *et al.*, 2020). However, our results provide no evidence for an effect of larval P:C  
390 diet on adult lifespan, regardless of stress treatment. Similarly, although intermediate P:C in  
391 the larval diet increased lifetime and early-life reproduction, there were no interactions between  
392 larval diet and stress treatment on reproduction, except for a smaller effect of P:C on the  
393 senescent decline in egg production for injured flies. Infection did however have effects on  
394 many life-history traits, specifically reducing lifespan and lifetime egg production, and  
395 increasing the rate of senescence in egg laying. These results suggest that, in this study,  
396 although P:C in larval diet affected larval and adult life-history traits, and exposure to infection  
397 in adulthood affected adult life-history traits, these effects did not interact very strongly.

398       Previous studies have suggested links between larval diet and the ability of adults to  
399 cope with environmental stress such as infection. For example, lower P:C nymphal diet with  
400 matching adult diet decreased adult survival post-infection measured for five days in female  
401 *Gryllus texensis* crickets (Kelly and Tawes 2013). Similarly, adult *Anopheles gambiae*  
402 mosquitoes raised as larvae on increasing CR had lower melanising ability (Suwanichinda  
403 and Paskewitz 1998). Studies measuring components of the immune system without a direct  
404 stressor have also shown that adults raised on non-optimal diets had lower adult immune  
405 function, with short term starvation (De Block and Stoks 2008) or caloric restriction (Rolff *et al.*  
406 2004). Similarly, adult *D. melanogaster* raised on higher P:C diets had higher levels of  
407 *Diptericin A* and *Metchnikowin* AMP transcription (Fellous and Lazzaro 2010). This is  
408 particularly relevant to our study, as AMPs are important in bacterial defence (reviewed in  
409 Zhang and Gallo, 2016) and in *D. melanogaster* AMPs including *Metchnikowin* and *Diptericin*  
410 are upregulated with *P. entomophila* infection (Liehl *et al.* 2006; Chakrabarti *et al.* 2012).  
411 However, in this previous study, only the amount of yeast in diet was altered without reducing  
412 carbohydrates thus altering both calorie and P:C content. Consequently, increased calories may  
413 be driving these effects and not the increase in P:C. As previous studies have all manipulated  
414 calories, perhaps the caloric value of juvenile diet affects adult immunity and not the  
415 macronutrient content. By only manipulating the P:C content of larval diets, our results suggest  
416 that macronutrient ratio does not affect adult survival post-infection.



417           Outside of differences in the type of diet manipulation, another factor that could explain  
418 our contrasting findings to previous research is the type of stress experienced. For example, *D.*  
419 *melanogaster* flies raised on higher P:C had a longer chill coma recovery time (Andersen et al.  
420 2010) and worse starvation resistance (Davies et al. 2018), however better heat coma and  
421 desiccation resistance (Andersen et al. 2010). It has been suggested that these larval diet effects  
422 are a result of effects on general body condition or specific tissues (Fellous and Lazzaro 2010),  
423 the production of heat shock proteins (Andersen et al. 2010), and more directly, lipid storage  
424 through eating a diet richer in carbohydrates as larvae (e.g. Roeder and Behmer, 2014; Kim,  
425 Jang and Lee, 2020). Our results suggest this does not seem true for immune responses, even  
426 though the fat body is an organ linked to both larval feeding and immune responses (reviewed  
427 in Arrese and Soulages, 2010). Larval feeding may therefore differentially affect adult stress  
428 response where certain diets are better for specific environmental stressors.

429           Another consideration is the timing of the stressor, as previous studies have applied  
430 stressors closer to eclosion. Our seven day lag post-eclosion could allow enough time for  
431 compensatory mechanisms (reviewed in Nestel *et al.*, 2016), such as compensatory feeding  
432 (Raubenheimer and Simpson 1993) to mask any effects of larval diet. For example, adults that  
433 developed on low P:C diets could have eaten enough protein to survive injury and infection to  
434 a similar level to adults that developed on higher P:C. Two studies that altered both larval and  
435 adult diets found that adult environment was the main determinant of life-history traits (Davies  
436 et al. 2018; Duxbury and Chapman 2020), however, in one there were small and complex  
437 differences in female lifetime reproduction between larval and adult diet combinations  
438 (Duxbury and Chapman 2020). It would therefore be interesting to repeat our experiment and  
439 expose adults to injury and infection stress immediately upon eclosion.

440           There was no effect of larval diet on survival or lifespan, as seen in other studies (Tu  
441 and Tatar 2003; Houslay et al. 2015; Davies et al. 2018). In adults, altering P:C affects lifespan,  
442 with lifespan maximised on either intermediate (e.g. Lee, 2015; Kim, Jang and Lee, 2020;  
443 Savola *et al.*, 2020) or low P:C diets (e.g. Lee *et al.*, 2008; Maklakov *et al.*, 2008; Jensen *et al.*,  
444 2015). A small number of studies have suggested an effect of larval diet P:C on adult lifespan,  
445 but results have been inconsistent (lifespan maximised on high (Duxbury and Chapman 2020),  
446 intermediate (Runagall-McNaull et al. 2015; Kim et al. 2019), and low (Economos 1984;  
447 Stefana et al. 2017) P:C diets). A more consistent role has been suggested for calories, with  
448 adult lifespan decreasing with larval calorie restriction (May et al. 2015; Adler et al. 2016;  
449 Hooper et al. 2017; Krittika et al. 2019). Given a meta-analysis found no overall effect of early-

450 life diet on lifespan (English and Uller 2016), such contrasting findings suggest no clear effect  
451 of larval diet on adult lifespan and instead suggest that lifespan is more determined by adult  
452 diet.

453         Lifetime and early-life reproduction increased with increasing larval P:C and then  
454 declined slightly at the highest P:C. Similarly, ovariole number has been show to peak at  
455 intermediate larval P:C in *Zaprionus indianus* (Matavelli et al. 2015) and in *Drosophila*  
456 *melanogaster* (Rodrigues et al. 2015). Many larval studies lack this decline at the highest P:C  
457 diets (e.g. Tu and Tatar, 2003; Andersen *et al.*, 2010; Silva-Soares *et al.*, 2017; Duxbury and  
458 Chapman, 2019; Kim *et al.*, 2019). Protein is often the limiting nutrient in egg production  
459 (reviewed in Wheeler, 1996; Boggs, 2009), but can have a toxic effect when consumed at very  
460 high levels (reviewed in Simpson and Raubenheimer, 2009), which may explain the plateauing  
461 at very high P:C due to larvae of worse condition developing to adults. Due to the highest P:C  
462 ratio also including the lowest carbohydrate content, this effect may also be due to a limiting  
463 effect of carbohydrates on development. As nutrients for egg production can be acquired from  
464 adult feeding and nutrient requirements can differ between species (reviewed in Wheeler,  
465 1996), this limit may not always appear. These P:C effects could also arise through the general  
466 increase in body condition with higher P:C in larval diet (Runagall-McNaull et al. 2015).  
467 Overall, there appears to be an increase in adult reproduction with increasing P:C in the larval  
468 diet, but this effect may plateau at very high P:C levels.

469         Infection reduced lifetime egg production, a typical response in insects (reviewed in  
470 Schwenke et al. 2016), however there was no interaction between larval P:C and reproduction  
471 post-infection. When accounting for the overall shorter lifespan of infected flies, their  
472 reproduction was comparable to the injured or unstressed flies. In the week after stress  
473 treatments, all treatment groups produced the same number of eggs. This suggests that with  
474 infection, individuals were able to produce more eggs earlier in life but then egg numbers  
475 declined. This was reflected in the reproductive ageing results, as infection increased the rate  
476 of senescence in egg laying. This could be evidence of terminal investment (Clutton-Brock  
477 1984), specifically fecundity compensation, as flies shifted their egg production earlier as a  
478 response to infection, as is a common outcome after infection (reviewed in Kutzer and  
479 Armitage, 2016).

480         In general, the patterns of reproductive ageing were quite similar across treatments, but  
481 there were some interactions between P:C in the larval diet and stress treatment. Overall, at  
482 intermediate P:C, ageing in egg production was quickest. Similar results in reproductive ageing

483 have been found in studies altering adult P:C (e.g. Jensen *et al.*, 2015; Savola *et al.*, 2020).  
484 These results are also similar to previous studies focusing on ageing in egg laying where adults  
485 raised on higher P:C and/or calories as larvae appear to have quicker ageing in egg laying (Tu  
486 and Tatar, 2003; Hooper *et al.*, 2017, but see May, Doroszuk and Zwaan, 2015). As these  
487 studies manipulated calories, here we show there are minor changes in ageing patterns also  
488 with P:C manipulation of the larval diet.

489 For the larval traits, we predicted that larvae would have more successful and quicker  
490 development on higher P:C diets (Britton and Edgar 1998; Colombani *et al.* 2003; Chang 2004;  
491 Mirth and Riddiford 2007). Development time was quickest on intermediate P:C, and egg-to-  
492 pupae and egg-to-adult viability were higher on higher P:C, as seen in previous studies (e.g.  
493 Andersen *et al.* 2010; Silva-Soares *et al.* 2017; Kutz *et al.* 2019, but see Houslay *et al.*, 2015;  
494 Davies *et al.*, 2018; Gray, Simpson and Polak, 2018). However, despite being statistically  
495 different, the effect of diet on egg-to-pupae and egg-to-adult viability was small. There was no  
496 effect of P:C on pupae-to-adult viability, suggesting that all of the diets used in our study  
497 allowed larvae to pupate successfully. Studies often do not report pupae-to-adult viability,  
498 however more extreme diets could affect this trait as different sources of carbohydrates have  
499 been shown to affect pupae-to-adult viability (Nash and Chapman 2014). On the highest P:C  
500 diet, development time was slightly slower, which is also a common finding (e.g. Lee *et al.*  
501 2012; Rodrigues *et al.* 2015; Kutz *et al.* 2019), again potentially due to toxic effects of high  
502 P:C diets (reviewed in Simpson and Raubenheimer, 2009) or due to a limitation of  
503 carbohydrates for development. Vials with more eggs took longer to develop, most likely due  
504 to larval density effects (e.g. Ludewig *et al.*, 2017; Klepsatel, Procházka and Gálíková, 2018;  
505 Henry, Tarapacki and Colinet, 2020; Than, Ponton and Morimoto, 2020). Our work adds to  
506 growing evidence of the importance of macronutrients in larval diet for larval development and  
507 suggest that, with some exceptions, intermediate P:C diets are better for key larval traits.

## 508 **CONCLUSIONS AND FUTURE WORK:**

509 The results of this study suggest that larval dietary P:C has no effect on adult survival  
510 with or without stress treatment, and thus larval P:C does not alter the long-term consequences  
511 of injury or infection on survival. Intermediate P:C larval diets were optimal for many traits  
512 pre-, and post-metamorphosis. Individuals were the quickest to develop into adults on  
513 intermediate larval P:C, and subsequent adults produced the most early-life and lifetime eggs.  
514 Larvae were more likely to develop into adults on higher P:C. Therefore, our results add to the  
515 growing evidence that larval diet affects adult life-history traits, but the long-term

516 consequences of infection and injury are not altered. To understand the effects of larval diet on  
517 the ability of adults to respond to infection further, we suggest experiments exposing adults to  
518 infection immediately after eclosion to avoid potential for compensatory feeding. Furthermore,  
519 using a fully factorial experiment combining variation in larval and adult diet could help to  
520 disentangle the differences between larval and adult feeding on stress responses such as  
521 infection and injury.

522

### 523 **ACKNOWLEDGEMENTS:**

524 This work was supported by the Biotechnology and Biological Sciences Research Council  
525 (BBSRC) grant number BB/M010996/1. We thank Joshua Moatt for helpful advice and  
526 comments on the data analysis and write-up, Katy Monteith for laboratory training and  
527 practical advice as well as help with data collection at the end of the experiment along with  
528 Paul McNeil and Paulina Mika, and Anu Halonen for data on confirmation of infection from  
529 one day of missing data.

530

### 531 **CONFLICTS OF INTEREST:**

532 The authors declare no conflicts of interest.

533

### 534 **AUTHORS'S CONTRIBUTIONS:**

535 ES, PV and CW designed the experiment. ES did the study and analysed the data with help  
536 from CW. ES wrote the paper with help from CW and PV.

537 **REFERENCES:**

- 538 Adamo, S. A. 2020. Animals have a Plan B : how insects deal with the dual challenge of  
539 predators and pathogens. *J. Comp. Physiol. B*, doi: 10.1007/s00360-020-01282-5.  
540 Springer Berlin Heidelberg.
- 541 Adler, M. I., M. Telford, and R. Bonduriansky. 2016. Phenotypes optimized for early-life  
542 reproduction exhibit faster somatic deterioration with age, revealing a latent cost of high  
543 condition. *J. Evol. Biol.* 29:2436–2446.
- 544 Andersen, L. H., T. N. Kristensen, V. Loeschke, S. Toft, and D. Mayntz. 2010. Protein and  
545 carbohydrate composition of larval food affects tolerance to thermal stress and  
546 desiccation in adult *Drosophila melanogaster*. *J. Insect Physiol.* 56:336–340.
- 547 Arrese, E. L., and J. L. Soulages. 2010. Insect fat body: Energy, metabolism, and regulation.  
548 *Annu. Rev. Entomol.* 55:207–225.
- 549 Bates, D., M. Maechler, B. Bolker, and S. Walker. 2015. Fitting Linear Mixed-Effects  
550 Models using lme4. *J. Stat. Software* 67:1–48.
- 551 Boggs, C. L. 2009. Understanding insect life histories and senescence through a resource  
552 allocation lens. *Funct. Ecol.* 23:27–37.
- 553 Britton, J. S., and B. A. Edgar. 1998. Environmental control of the cell cycle in *Drosophila*:  
554 Nutrition activates mitotic and endoreplicative cells by distinct mechanisms.  
555 *Development* 125:2149–2158.
- 556 Brooks, M. E., K. Kristensen, K. J. van Benthem, A. Magnusson, C. W. Berg, A. Nielsen, H.  
557 J. Skaug, M. Maechler, and B. M. Bolker. 2017. glmmTMB Balances Speed and  
558 Flexibility Among Packages for Zero-inflated Generalized Linear Mixed Modeling. *R J.*  
559 9:378–400.
- 560 Chakrabarti, S., P. Liehl, N. Buchon, and B. Lemaitre. 2012. Infection-induced host  
561 translational blockage inhibits immune responses and epithelial renewal in the  
562 *Drosophila* gut. *Cell Host Microbe* 12:60–70. Elsevier Inc.
- 563 Chang, C. L. 2004. Effect of amino acids on larvae and adults of *Ceratitis capitata* (Diptera:  
564 Tephritidae). *Ann. Entomol. Soc. Am.* 97:529–535.
- 565 Clancy, D. J., and W. J. Kennington. 2001. A simple method to achieve consistent larval  
566 density in bottle cultures. *Drosoph. Inf. Serv.* 84:168–169.

- 567 Clutton-Brock, T. H. 1984. Reproductive effort and terminal investment in iteroparous  
568 animals. *Am. Nat.* 123:212–229.
- 569 Colombani, J., S. Raisin, S. Pantalacci, T. Radimerski, J. Montagne, and P. Léopold. 2003. A  
570 nutrient sensor mechanism controls *Drosophila* growth. *Cell* 114:739–749.
- 571 Cordes, N., F. Albrecht, L. Engqvist, T. Schmoll, M. Baier, C. Müller, and K. Reinhold.  
572 2015. Larval food composition affects courtship song and sperm expenditure in a  
573 lekking moth. *Ecol. Entomol.* 40:34–41.
- 574 Cotter, S. C., C. E. Reavey, Y. Tummala, J. L. Randall, R. Holdbrook, F. Ponton, S. J.  
575 Simpson, J. A. Smith, and K. Wilson. 2019. Diet modulates the relationship between  
576 immune gene expression and functional immune responses. *Insect Biochem. Mol. Biol.*  
577 109:128–141. Elsevier.
- 578 Cotter, S. C., S. J. Simpson, D. Raubenheimer, and K. Wilson. 2011. Macronutrient balance  
579 mediates trade-offs between immune function and life history traits. *Funct. Ecol.*  
580 25:186–198.
- 581 Davies, L. R., M. F. Schou, T. N. Kristensen, and V. Loeschcke. 2018. Linking  
582 developmental diet to adult foraging choice in *Drosophila melanogaster*. *J. Exp. Biol.*  
583 221:1–7.
- 584 De Block, M., and R. Stoks. 2008. Short-term larval food stress and associated compensatory  
585 growth reduce adult immune function in a damselfly. *Ecol. Entomol.* 33:796–801.
- 586 Dieppois, G., O. Opota, J. Lalucat, and B. Lemaitre. 2015. *Pseudomonas entomophila*: A  
587 Versatile Bacterium with Entomopathogenic Properties. Pp. 25–34 in J.-L. Ramos, J. B.  
588 Goldberg, and A. Filloux, eds. *Pseudomonas: Volume 7: New Aspects of Pseudomonas*  
589 *Biology*. Springer Netherlands, Dordrecht.
- 590 Duxbury, E. M. L., and T. Chapman. 2020. Sex-Specific Responses of Life Span and Fitness  
591 to Variation in Developmental Versus Adult Diets in *Drosophila melanogaster*. *J*  
592 *Gerontol A Biol Sci Med Sci* 75:1431–1438.
- 593 Economos, A. 1984. Growth Rate and Life Span in *Drosophila*. *27*:143–151.
- 594 English, S., and T. Uller. 2016. Does early-life diet affect longevity? A meta-analysis across  
595 experimental studies. *Biol. Lett.* 12.
- 596 Fanson, B. G., K. V. Fanson, and P. W. Taylor. 2012. Cost of reproduction in the Queensland

- 597 fruit fly: Y-model versus lethal protein hypothesis. *Proc. R. Soc. B Biol. Sci.* 279:4893–  
598 4900.
- 599 Fellous, S., and B. P. Lazzaro. 2010. Larval food quality affects adult (but not larval) immune  
600 gene expression independent of effects on general condition. *Mol. Ecol.* 19:1462–1468.
- 601 Gray, L. J., S. J. Simpson, and M. Polak. 2018. Fruit flies may face a nutrient-dependent life-  
602 history trade-off between secondary sexual trait quality, survival and developmental  
603 rate. *J. Insect Physiol.* 104:60–70. Elsevier.
- 604 Gupta, V., R. B. Vasanthakrishnan, J. Siva-Jothy, K. M. Monteith, S. P. Brown, and P. F.  
605 Vale. 2017. The route of infection determines Wolbachia antibacterial protection in  
606 *Drosophila*. *Proc. R. Soc. B Biol. Sci.* 284.
- 607 Hartig, F. 2019. DHARMA: Residual Diagnostics for Hierarchical (Multi-Level/Mixed)  
608 Regression Models.
- 609 Henry, Y., P. Tarapacki, and H. Colinet. 2020. Larval density affects phenotype and  
610 surrounding bacterial community without altering gut microbiota in *Drosophila*  
611 *melanogaster*. *FEMS Microbiol. Ecol.*, doi: 10.1093/femsec/fiaa055.
- 612 Hoffman, A. A., and M. J. Hercus. 2000. Environmental Stress as an Evolutionary Force.  
613 *Bioscience* 50:217–226.
- 614 Hooper, A. K., F. Spagopoulou, Z. Wylde, A. A. Maklakov, and R. Bonduriansky. 2017.  
615 Ontogenetic timing as a condition-dependent life history trait: High-condition males  
616 develop quickly, peak early, and age fast. *Evolution (N. Y.)*. 71:671–685.
- 617 House, C. M., K. Jensen, J. Rapkin, S. Lane, K. Okada, D. J. Hosken, and J. Hunt. 2016.  
618 Macronutrient balance mediates the growth of sexually selected weapons but not  
619 genitalia in male broad-horned beetles. *Funct. Ecol.* 30:769–779.
- 620 Houslay, T. M., J. Hunt, M. C. Tinsley, and L. F. Bussière. 2015. Sex differences in the  
621 effects of juvenile and adult diet on age-dependent reproductive effort. *J. Evol. Biol.*  
622 28:1067–1079.
- 623 Hunt, J., R. Brooks, M. D. Jennions, M. J. Smith, C. L. Bentsen, and L. F. Bussière. 2004.  
624 High-quality male field crickets invest heavily in sexual display but die young. *Nature*  
625 432:1024–1027.
- 626 Jensen, K., C. McClure, N. K. Priest, and J. Hunt. 2015. Sex-specific effects of protein and

- 627 carbohydrate intake on reproduction but not lifespan in *Drosophila melanogaster*. *Aging*  
628 *Cell* 14:605–615.
- 629 Kassambara, A., and M. Kosinski. 2018. survminer: Drawing Survival Curves using  
630 “ggplot2.”
- 631 Kawasaki, N., C. E. Brassil, R. C. Brooks, and R. Bonduriansky. 2008. Environmental effects  
632 on the expression of life span and aging: An extreme contrast between wild and captive  
633 cohorts of *Telostylinus angusticollis* (Diptera: Neriidae). *Am. Nat.* 172:346–357.
- 634 Kelly, C. D., and B. R. Tawes. 2013. Sex-Specific Effect of Juvenile Diet on Adult Disease  
635 Resistance in a Field Cricket. *PLoS One* 8.
- 636 Kim, K. E., T. Jang, and K. P. Lee. 2020. Combined effects of temperature and macronutrient  
637 balance on life-history traits in *Drosophila melanogaster*: implications for life-history  
638 trade-offs and fundamental niche. *Oecologia*, doi: 10.1007/s00442-020-04666-0.  
639 Springer Berlin Heidelberg.
- 640 Kim, K., T. Jang, K. J. Min, and K. P. Lee. 2019. Effects of dietary protein:carbohydrate  
641 balance on life-history traits in six laboratory strains of *Drosophila melanogaster*.  
642 *Entomol. Exp. Appl.* 1–10.
- 643 Klemola, N., T. Klemola, M. J. Rantala, and T. Ruuhola. 2007. Natural host-plant quality  
644 affects immune defence of an insect herbivore. *Entomol. Exp. Appl.* 123:167–176.
- 645 Klepsatel, P., E. Procházka, and M. Gáliková. 2018. Crowding of *Drosophila* larvae affects  
646 lifespan and other life-history traits via reduced availability of dietary yeast. *Exp.*  
647 *Gerontol.* 110:298–308. Elsevier.
- 648 Knutie, S. A., L. A. Shea, M. Kupselaitis, C. L. Wilkinson, K. D. Kohl, and J. R. Rohr. 2017.  
649 Integrative and Comparative Biology Early-Life Diet Affects Host Microbiota and  
650 Later-Life Defenses Against Parasites in Frogs. *Integr. Comp. Biol.* 57:732–742.
- 651 Krittika, S., A. Lenka, and P. Yadav. 2019. Evidence of dietary protein restriction regulating  
652 pupation height, development time and lifespan in *Drosophila melanogaster*. *Biol. Open*  
653 8:1–9.
- 654 Kutz, T. C., C. M. Sgrò, and C. K. Mirth. 2019. Interacting with change: Diet mediates how  
655 larvae respond to their thermal environment. *Funct. Ecol.* 33:1940–1951.
- 656 Kutzer, M. A. M., and S. A. O. Armitage. 2016. Maximising fitness in the face of parasites: a



- 657 review of host tolerance. *Zoology* 119:281–289. Elsevier GmbH.
- 658 Lee, J.-E., and I. Edery. 2008. Circadian regulation in the ability of *Drosophila* to combat  
659 pathogenic infections. *Curr. Biol.* 18:195–199.
- 660 Lee, K. P. 2015. Dietary protein: Carbohydrate balance is a critical modulator of lifespan and  
661 reproduction in *Drosophila melanogaster*: A test using a chemically defined diet. *J.*  
662 *Insect Physiol.* 75:12–19. Elsevier Ltd.
- 663 Lee, K. P., J. S. Cory, K. Wilson, D. Raubenheimer, and S. J. Simpson. 2006. Flexible diet  
664 choice offsets protein costs of pathogen resistance in a caterpillar. *Proc. R. Soc. B Biol.*  
665 *Sci.* 273:823–829.
- 666 Lee, K. P., S. T. Kwon, and C. Roh. 2012. Caterpillars use developmental plasticity and diet  
667 choice to overcome the early life experience of nutritional imbalance. *Anim. Behav.*  
668 84:785–793. Elsevier Ltd.
- 669 Lee, K. P., S. J. Simpson, F. J. Clissold, R. Brooks, J. W. O. Ballard, P. W. Taylor, N. Soran,  
670 and D. Raubenheimer. 2008. Lifespan and reproduction in *Drosophila*: New insights  
671 from nutritional geometry. *Proc. Natl. Acad. Sci. U. S. A.* 105:2498–2503.
- 672 Lewis, E. B. 1960. A new standard food medium. *Drosoph. Inf. Serv.* 34:117–118.
- 673 Liehl, P., M. Blight, N. Vodovar, F. Boccard, and B. Lemaitre. 2006. Prevalence of local  
674 immune response against oral infection in a *Drosophila/Pseudomonas* infection model.  
675 *PLoS Pathog.* 2:0551–0561.
- 676 Littlefair, J. E., and R. J. Knell. 2016. Within- and trans-generational effects of variation in  
677 dietary macronutrient content on life-history traits in the moth *Plodia interpunctella*.  
678 *PLoS One* 11:1–16.
- 679 Ludewig, A. H., C. Gimond, J. C. Judkins, S. Thornton, D. C. Pulido, R. J. Micikas, F.  
680 Döring, A. Antebi, C. Braendle, and F. C. Schroeder. 2017. Larval crowding accelerates  
681 *C. elegans* development and reduces lifespan. *PLoS Genet.* 13:1–21.
- 682 Mackay, T. F. C., S. Richards, E. A. Stone, A. Barbadilla, J. F. Ayroles, D. Zhu, S. Casillas,  
683 Y. Han, M. M. Magwire, J. M. Cridland, M. F. Richardson, R. R. H. Anholt, M. Barrón,  
684 C. Bess, K. P. Blankenburg, M. A. Carbone, D. Castellano, L. Chaboub, L. Duncan, Z.  
685 Harris, M. Javaid, J. C. Jayaseelan, S. N. Jhangiani, K. W. Jordan, F. Lara, F. Lawrence,  
686 S. L. Lee, P. Librado, R. S. Linheiro, R. F. Lyman, A. J. Mackey, M. Munidasa, D. M.

- 687 Muzny, L. Nazareth, I. Newsham, L. Perales, L.-L. Pu, C. Qu, M. Ràmia, J. G. Reid, S.  
688 M. Rollmann, J. Rozas, N. Saada, L. Turlapati, K. C. Worley, Y.-Q. Wu, A. Yamamoto,  
689 Y. Zhu, C. M. Bergman, K. R. Thornton, D. Mittelman, and R. A. Gibbs. 2012. The  
690 *Drosophila melanogaster* Genetic Reference Panel. *Nature* 482:173–178.
- 691 Mair, W., and A. Dillin. 2008. Aging and Survival: The Genetics of Life Span Extension by  
692 Dietary Restriction. *Annu. Rev. Biochem.* 77:727–754.
- 693 Maklakov, A. A., S. J. Simpson, F. Zajitschek, M. D. Hall, J. Dessmann, F. Clissold, D.  
694 Raubenheimer, R. Bonduriansky, and R. C. Brooks. 2008. Sex-specific fitness effects of  
695 nutrient intake on reproduction and lifespan. *Curr. Biol.* 18:1062–1066.
- 696 Matavelli, C., M. J. A. Carvalho, N. E. Martins, and C. K. Mirth. 2015. Differences in larval  
697 nutritional requirements and female oviposition preference reflect the order of fruit  
698 colonization of *Zaprionus indianus* and *Drosophila simulans*. *J. Insect Physiol.* 82:66–  
699 74. Elsevier Ltd.
- 700 May, C. M., A. Doroszuk, and B. J. Zwaan. 2015. The effect of developmental nutrition on  
701 life span and fecundity depends on the adult reproductive environment in *Drosophila*  
702 *melanogaster*. *Ecol. Evol.* 5:1156–1168.
- 703 Metcalfe, N. B., and P. Monaghan. 2001. Compensation for a bad start: Grow now, pay later?  
704 *Trends Ecol. Evol.* 16:254–260.
- 705 Metcalfe, N. B., and P. Monaghan. 2003. Growth versus lifespan: Perspectives from  
706 evolutionary ecology. *Exp. Gerontol.* 38:935–940.
- 707 Mirth, C. K., and L. M. Riddiford. 2007. Size assessment and growth control: how adult size  
708 is determined in insects. *BioEssays* 29:344–355.
- 709 Moatt, J. P., M. A. Fyfe, E. Heap, L. J. M. Mitchell, F. Moon, and C. A. Walling. 2019.  
710 Reconciling nutritional geometry with classical dietary restriction: Effects of nutrient  
711 intake, not calories, on survival and reproduction. *Aging Cell* 18.
- 712 Nash, W. J., and T. Chapman. 2014. Effect of dietary components on larval life history  
713 characteristics in the medfly (*Ceratitidis capitata*: Diptera, Tephritidae). *PLoS One* 9.
- 714 Nestel, D., N. T. Papadopoulos, C. Pascacio-Villafán, N. Righini, A. R. Altuzar-Molina, and  
715 M. Aluja. 2016. Resource allocation and compensation during development in  
716 holometabolous insects. *J. Insect Physiol.* 95:78–88. Elsevier Ltd.

- 717 Pascacio-Villafán, C., T. Williams, A. Birke, and M. Aluja. 2016. Nutritional and non-  
718 nutritional food components modulate phenotypic variation but not physiological trade-  
719 offs in an insect. *Sci. Rep.* 6:1–11. Nature Publishing Group.
- 720 Peck, M. D., G. F. Babcock, and J. W. Alexander. 1992. The role of protein and calorie  
721 restriction in outcome from Salmonella infection in mice. *J. Parenter. Enter. Nutr.*  
722 16:561–565.
- 723 Ponton, F., J. Morimoto, K. Robinson, S. S. Kumar, S. C. Cotter, K. Wilson, and S. J.  
724 Simpson. 2020. Macronutrients modulate survival to infection and immunity in  
725 *Drosophila*. *J. Anim. Ecol.* 89:460–470.
- 726 Povey, S., S. C. Cotter, S. J. Simpson, K. P. Lee, and K. Wilson. 2009. Can the protein costs  
727 of bacterial resistance be offset by altered feeding behaviour? *J. Anim. Ecol.* 78:437–  
728 446.
- 729 Povey, S., S. C. Cotter, S. J. Simpson, and K. Wilson. 2014. Dynamics of macronutrient self-  
730 medication and illness-induced anorexia in virally infected insects. *J. Anim. Ecol.*  
731 83:245–255.
- 732 R Core Team. 2014. R: A language and environment for statistical computing. R Foundation  
733 for Statistical Computing, Vienna, Austria.
- 734 Raubenheimer, D., and S. J. Simpson. 1993. The geometry of compensatory feeding in the  
735 locust. *Anim. Behav.* 45:953–964.
- 736 Rodrigues, M. A., N. E. Martins, L. F. Balance, L. N. Broom, A. J. S. Dias, A. S. D.  
737 Fernandes, F. Rodrigues, E. Sucena, and C. K. Mirth. 2015. *Drosophila melanogaster*  
738 larvae make nutritional choices that minimize developmental time. *J. Insect Physiol.*  
739 81:69–80.
- 740 Roeder, K. A., and S. T. Behmer. 2014. Lifetime consequences of food protein-carbohydrate  
741 content for an insect herbivore. *Funct. Ecol.* 28:1135–1143.
- 742 Rolff, J., F. Van De Meutter, and R. Stoks. 2004. Time constraints decouple age and size at  
743 maturity and physiological traits. *Am. Nat.* 164:559–565.
- 744 Runagall-McNaull, A., R. Bonduriansky, and A. J. Crean. 2015. Dietary protein and lifespan  
745 across the metamorphic boundary: Protein-restricted larvae develop into short-lived  
746 adults. *Sci. Rep.* 5. Nature Publishing Group.

- 747 Savola, E., C. Montgomery, F. M. Waldron, K. Monteith, P. Vale, and C. Walling. 2020.  
748 Testing evolutionary explanations for the lifespan benefit of dietary restriction in  
749 *Drosophila melanogaster*. *bioRxiv* 1–39.
- 750 Schwenke, R. A., B. P. Lazzaro, and M. F. Wolfner. 2016. Reproduction-Immunity Trade-  
751 Offs in Insects. *Annu. Rev. Entomol.* 61:239–256.
- 752 Sentinella, A. T., A. J. Crean, and R. Bonduriansky. 2013. Dietary protein mediates a trade-  
753 off between larval survival and the development of male secondary sexual traits. *Funct.*  
754 *Ecol.* 27:1134–1144.
- 755 Silva-Soares, N. F., A. Nogueira-Alves, P. Beldade, and C. K. Mirth. 2017. Adaptation to  
756 new nutritional environments: Larval performance, foraging decisions, and adult  
757 oviposition choices in *Drosophila suzukii*. *BMC Ecol.* 17:1–13. BioMed Central.
- 758 Simpson, S. J., D. G. Le Couteur, D. Raubenheimer, S. M. Solon-Biet, G. J. Cooney, V. C.  
759 Cogger, and L. Fontana. 2017. Dietary protein, aging and nutritional geometry. *Ageing*  
760 *Res. Rev.* 39:78–86. Elsevier B.V.
- 761 Simpson, S. J., and D. Raubenheimer. 2009. *Macronutrient balance and lifespan*. *Ageing*  
762 (Albany, NY). 1:875–880.
- 763 Simpson, S. J., and D. Raubenheimer. 2012. *The Nature of Nutrition*. Princeton University  
764 Press, Oxfordshire.
- 765 Speakman, J. R., S. E. Mitchell, and M. Mazidi. 2016. Calories or protein? The effect of  
766 dietary restriction on lifespan in rodents is explained by calories alone. *Exp. Gerontol.*  
767 86:1–11. Elsevier Inc.
- 768 Stefana, M. I., P. C. Driscoll, F. Obata, A. R. Pengelly, C. L. Newell, J. I. MacRae, and A. P.  
769 Gould. 2017. Developmental diet regulates *Drosophila* lifespan via lipid autotoxins. *Nat.*  
770 *Commun.* 8. Springer US.
- 771 Suwanchaichinda, C., and S. M. Paskewitz. 1998. Effects of Larval Nutrition, Adult Body  
772 Size, and Adult Temperature on the Ability of *Anopheles gambiae* (Diptera: Culicidae)  
773 to Melanize Sephadex Beads. *J. Med. Entomol.* 35:157–161.
- 774 Than, A. T., F. Ponton, and J. Morimoto. 2020. Integrative developmental ecology: a review  
775 of density-dependent effects on life-history traits and host-microbe interactions in non-  
776 social holometabolous insects. *Evol. Ecol.* 34:659–680. Springer International

777 Publishing.

778 Therneau, T. 2015. A Package for Survival Analysis in R.

779 Troha, K., and N. Buchon. 2019. Methods for the study of innate immunity in *Drosophila*  
780 *melanogaster*. *Wiley Interdiscip. Rev. Dev. Biol.* e344.

781 Tu, M. P., and M. Tatar. 2003. Juvenile diet restriction and the aging and reproduction of  
782 adult *Drosophila melanogaster*. *Aging Cell* 2:327–333.

783 Van Voorhies, W. A., J. Fuchs, and S. Thomas. 2005. The longevity of *Caenorhabditis*  
784 *elegans* in soil. *Biol. Lett.* 1:247–249.

785 Venesky, M. D., T. E. Wilcoxon, M. A. Rensel, L. Rollins-Smith, J. L. Kerby, and M. J.  
786 Parris. 2012. Dietary protein restriction impairs growth, immunity, and disease  
787 resistance in southern leopard frog tadpoles. *Oecologia* 169:23–31.

788 Wheeler, D. 1996. The role of nourishment in oogenesis. *Annu. Rev. Entomol.* Vol. 41  
789 41:407–431.

790 Wickham, H. 2016. *ggplot2: Elegant Graphics for Data Analysis*. Springer-Verlag New York.

791 Zhang, L. J., and R. L. Gallo. 2016. Antimicrobial peptides. *Curr. Biol.* 26:R14–R19.  
792 Elsevier.
