# Supplementary material for: Larval diet affects adult reproduction but not survival regardless of injury and infection stress in Drosophila melanogaster
Source: bioRxiv or medRxiv preprint supplement (doi:10.1101/2020.10.16.342618), 2020-10-16
Supplement: Supplementary file [file media-1.pdf]

1 SUPPLEMENTARY METHODS:

2 **Table S1:** Information on the five diets as a subset of ten diets used in (Savola et al., 2020).  
 3 The standard Lewis food and associated P:C ratio is in bold (Lewis, 1960). One of the main  
 4 differences to the original Lewis food recipe is the replacement of dextrose and sucrose with  
 5 brown sugar in our diets (Lewis, 1960). The P:C ratios (rounded to the nearest whole number)  
 6 incorporate the protein and carbohydrate contributed by maize. Yeast and sugar are roughly  
 7 isocaloric, so P:C ratios can be altered without altering the energy content of the diet by  
 8 replacing yeast with sugar (Mair et al., 2005).

| P:C ratio  | Protein in diet (%) | Yeast (g)    | Sugar (g)    | Maize (g)  |              |             | Agar (g)    | Nipagin (ml) | dH <sub>2</sub> O (l) |
|------------|---------------------|--------------|--------------|------------|--------------|-------------|-------------|--------------|-----------------------|
|            |                     |              |              | Total      | Carbohydrate | Protein     |             |              |                       |
| 1:16       | 5                   | 21.3         | 653.7        | 415        | 290.5        | 37.8        | 41.2        | 90           | 6                     |
| <b>1:6</b> | <b>14</b>           | <b>112.5</b> | <b>562.5</b> | <b>415</b> | <b>290.5</b> | <b>37.8</b> | <b>41.2</b> | <b>90</b>    | <b>6</b>              |
| 1:2        | 31                  | 296.7        | 378.3        | 415        | 290.5        | 37.8        | 41.2        | 90           | 6                     |
| 1:1        | 46                  | 463.9        | 211.1        | 415        | 290.5        | 37.8        | 41.2        | 90           | 6                     |
| 2:1        | 61                  | 631.1        | 43.9         | 415        | 290.5        | 37.8        | 41.2        | 90           | 6                     |

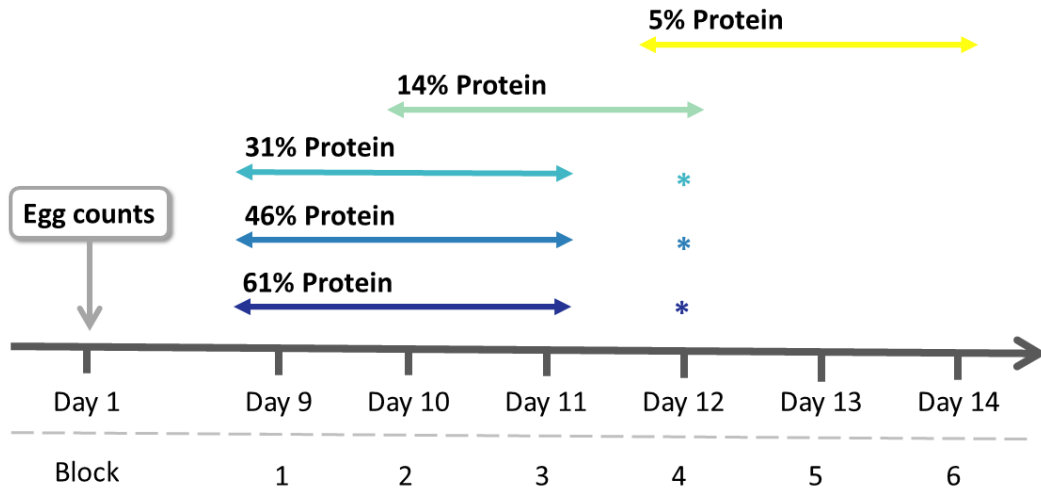

9

10 **Figure S1:** Schematic for adult collection across days to create 6 blocks of females. Stars (\*)  
 11 indicate if only a few addition adults were collected on this day to reach sample size per diet  
 12 (see methods).

13 **Table S2:** Total sample size per diet and treatment of flies collected across three to four days  
 14 after eclosion started.

| Protein in diet (%) | P:C ratio | Stress treatment |        |           |
|---------------------|-----------|------------------|--------|-----------|
|                     |           | Control          | Injury | Infection |
| 5                   | 1:16      | 35               | 40     | 35        |
| 14                  | 1:6       | 32               | 36     | 30        |
| 31                  | 1:2       | 25               | 24     | 25        |
| 46                  | 1:1       | 19               | 19     | 18        |
| 61                  | 2:1       | 22               | 24     | 23        |

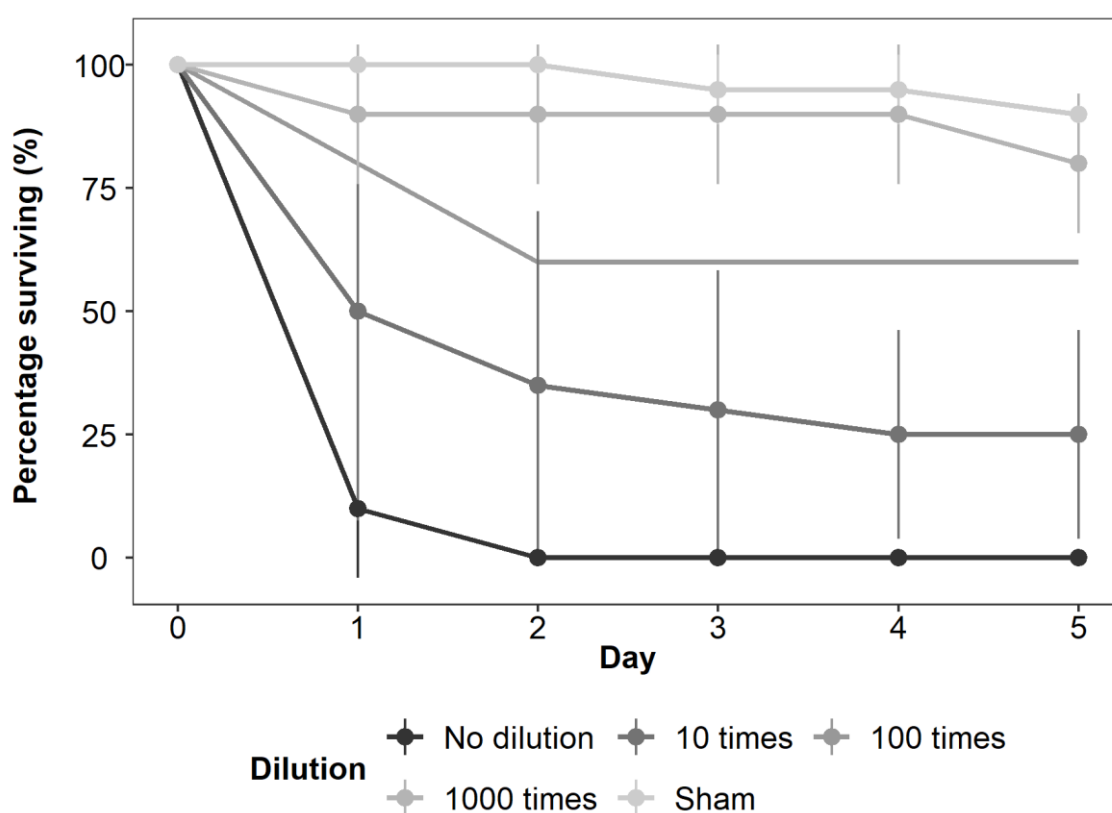

15  
 16 **Figure S2:** Dilution series for *Pseudomonas entomophila* bacterial solution from the same  
 17 stock as used in infections. 10 females per vial were infected with the specified solution (no  
 18 dilution to 1000 times dilution) or with no pathogen (“Sham”). Results show mean survival of  
 19 two replicates of ten flies and the vertical lines indicate standard deviation, except for the 100  
 20 times dilution, which only has one replicate.

21 **Bacterial growth (CFU) measurements:**

22 24 hours post-infection two replicate groups of three flies from the infected, sham and  
23 control groups were plated (following Gupta et al., 2017). Across infection blocks, colonies  
24 grew on the plates confirming successful infections, except for the first block where initially  
25 only one fly per sample was used for the plating. Infected flies from the first block showed  
26 similar levels of mortality to flies from other blocks, suggesting they were indeed infected and  
27 that use of only a single fly resulted in bacterial levels that were below a detection threshold in  
28 the assay. Due to logistical reasons, the last block of infections was plated 48 hours post-  
29 infection, however another group of infected flies from the same overnight bacterial culture  
30 showed growth (Halonen, data not shown).

31 REFERENCES:

- 32 Gupta, V., Vasanthakrishnan, R.B., Siva-Jothy, J., Monteith, K.M., Brown, S.P. & Vale, P.F.  
33 (2017). The route of infection determines Wolbachia antibacterial protection in  
34 *Drosophila*. *Proceedings of the Royal Society B: Biological Sciences*. 284 (1856).
- 35 Lewis, E.B. (1960). A new standard food medium. *Drosophila Information Service*. 34. p.pp.  
36 117–118.
- 37 Mair, W., Piper, M.D.W. & Partridge, L. (2005). Calories do not explain extension of life  
38 span by dietary restriction in *Drosophila*. *PLoS Biology*. 3 (7). p.pp. 1305–1311.
- 39 Savola, E., Montgomery, C., Waldron, F.M., Monteith, K., Vale, P. & Walling, C. (2020).  
40 Testing evolutionary explanations for the lifespan benefit of dietary restriction in  
41 *Drosophila melanogaster*. *bioRxiv*. p.pp. 1–39.

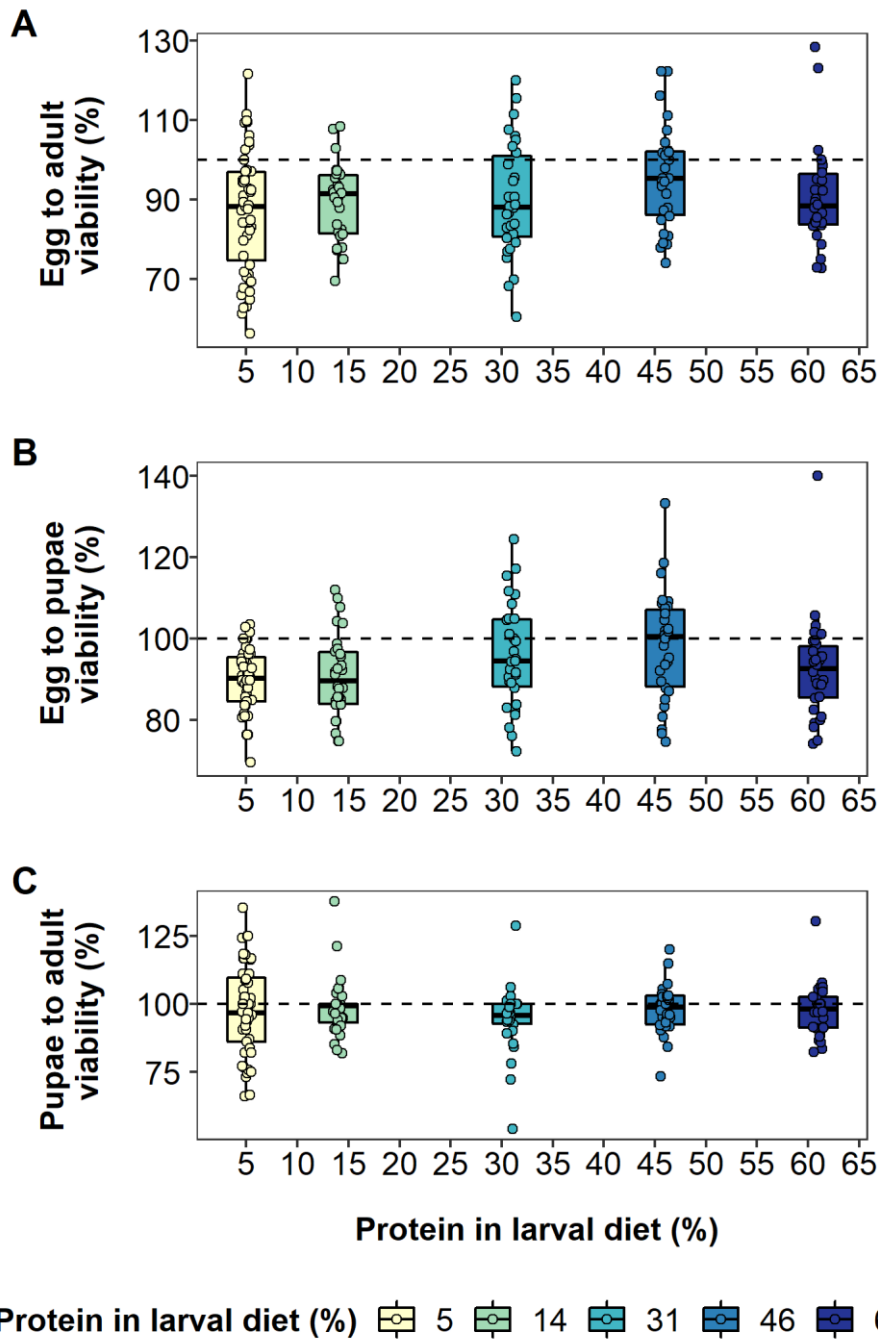

43

44 **Figure S3:** Effects of protein in larval diet on the percentage of eggs developing to adults (A),  
 45 eggs developing to pupae (B) and pupae developing to adults (C). Values are over 100% due  
 46 to inaccuracies in egg and pupal counts. The lines in the box plots indicate median values (50%  
 47 quantile), boxes are the interquartile range (25% to 75% quantiles) and whiskers are minimum  
 48 or maximum quartiles (25% - 1.5 x interquartile range, 75% + 1.5 x interquartile range).

49 **Table S3:** Model summary of a Gaussian linear model of the effects of protein in larval diet  
50 and the number of eggs laid in the vial (averaged over two counts, see methods) on the number  
51 of adults developing per vial (A); the number of eggs laid in the vial on the number of pupae  
52 developing per vial (B); and the number of pupae in the vial on the number of adults developing  
53 per vial (C). Protein and protein<sup>2</sup> are mean centered to standard deviation of 1. Significant  
54 results below significance level  $\alpha = 0.05$  are bolded.

| (A) Number of adults developing from eggs:  |             |                |          |               |                  |
|---------------------------------------------|-------------|----------------|----------|---------------|------------------|
|                                             | Estimate    | Standard error | Df       | F             | Pr (>F)          |
| Intercept                                   | 8.27        | 1.54           |          |               |                  |
| <b>Average number of eggs</b>               | <b>0.72</b> | <b>0.03</b>    | <b>1</b> | <b>762.19</b> | <b>&lt;0.001</b> |
| <b>Protein</b>                              | <b>2.20</b> | <b>0.55</b>    | <b>1</b> | <b>15.90</b>  | <b>&lt;0.001</b> |
| Protein <sup>2</sup>                        | -0.66       | 0.69           | 1        | 0.91          | 0.34             |
| (B) Number of pupae developing from eggs:   |             |                |          |               |                  |
|                                             | Estimate    | Standard error | Df       | F             | Pr (>F)          |
| Intercept                                   | 3.99        | 1.47           |          |               |                  |
| <b>Average number of eggs</b>               | <b>0.86</b> | <b>0.03</b>    | <b>1</b> | <b>1165.5</b> | <b>&lt;0.001</b> |
| <b>Protein</b>                              | <b>1.79</b> | <b>0.52</b>    | <b>1</b> | <b>9.13</b>   | <b>0.003</b>     |
| Protein <sup>2</sup>                        | -1.05       | 0.66           | 1        | 2.57          | 0.11             |
| (C) Number of adults developing from pupae: |             |                |          |               |                  |
|                                             | Estimate    | Standard error | Df       | F             | Pr (>F)          |
| Intercept                                   | 6.15        | 1.27           |          |               |                  |
| <b>Pupae</b>                                | <b>0.82</b> | <b>0.02</b>    | <b>1</b> | <b>1228.5</b> | <b>&lt;0.001</b> |
| Protein                                     | 0.70        | 0.45           | 1        | 3.81          | 0.052            |
| Protein <sup>2</sup>                        | 0.31        | 0.56           | 1        | 0.31          | 0.58             |

56 **Table S4:** Model summary of a Poisson model of the effects of protein in larval diet and the  
 57 average number of eggs laid in the vial on the number of days until adult eclosion. Vial ID was  
 58 fitted as a random effect. Protein, protein<sup>2</sup> and average egg counts are mean centered to  
 59 standard deviation of 1. Significant results below significance level  $\alpha = 0.05$  are bolded.

|                               | Estimate     | Standard error | Z value       | Df       | Chisq         | Pr<br>(>Chisq)   |
|-------------------------------|--------------|----------------|---------------|----------|---------------|------------------|
| Intercept                     | 2.23         | 0.01           | 206.87        |          |               |                  |
| <b>Protein</b>                | <b>-0.22</b> | <b>0.01</b>    | <b>-35.32</b> | <b>1</b> | <b>191.75</b> | <b>&lt;0.001</b> |
| <b>Protein<sup>2</sup></b>    | <b>0.16</b>  | <b>0.01</b>    | <b>18.33</b>  | <b>1</b> | <b>183.61</b> | <b>&lt;0.001</b> |
| <b>Average number of eggs</b> | <b>0.03</b>  | <b>0.01</b>    | <b>5.39</b>   | <b>1</b> | <b>26.80</b>  | <b>&lt;0.001</b> |

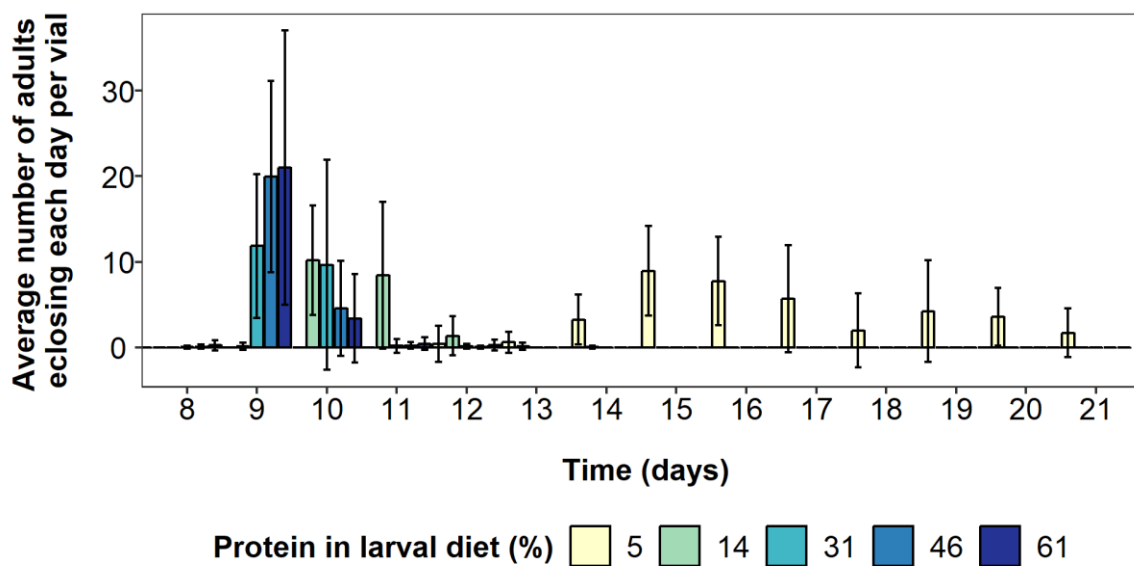

60

61 **Figure S4:** Effects of protein in larval diet on the average number of adult flies eclosing each  
 62 day after egg production. No adults eclosed prior to day 8, so these days are not shown. Error  
 63 bars are standard deviations.

64 **Table S5:** Summary of main effects parameter estimates and associated LRT test values for a  
65 binomial model of the effects of protein in larval diet and stress treatments on mortality risk  
66 per day. The values are from models not including interactions with the specific main effect.  
67 Chi-squared and associated p-values are from LRT tests comparing a model with no  
68 interactions associated with the main effect to a model with no main effect. Protein and protein<sup>2</sup>  
69 are mean centered to standard deviation of 1. Significant results below significance level  $\alpha =$   
70 0.05 are bolded.

|                            | Estimate    | Standard error | Z value       | Df       | Chisq        | Pr (>Chisq)      |
|----------------------------|-------------|----------------|---------------|----------|--------------|------------------|
| <b>Injury treatment</b>    | <b>0.24</b> | <b>0.17</b>    | <b>-27.26</b> | <b>2</b> | <b>76.67</b> | <b>&lt;0.001</b> |
| <b>Infection treatment</b> | <b>1.18</b> | <b>0.13</b>    | <b>1.87</b>   |          |              |                  |
| Protein                    | 0.05        | 0.05           | 0.98          | 1        | 0.88         | 0.35             |
| Protein <sup>2</sup>       | -0.07       | 0.07           | -1.01         | 1        | 0.98         | 0.32             |

71 **Table S6:** Model summary of a binomial model of the effects of protein in larval diet and stress  
72 treatments on mortality risk per day. Protein and protein<sup>2</sup> are mean centered to standard  
73 deviation of 1.

|                                | Estimate | Standard error | Z value | Df | Chisq | Pr (>Chisq) |
|--------------------------------|----------|----------------|---------|----|-------|-------------|
| Intercept                      | -4.52    | 0.19           | -23.34  |    |       |             |
| Injury treatment               | 0.12     | 0.21           | 0.57    |    |       |             |
| Infection treatment            | 1.02     | 0.21           | 4.94    |    |       |             |
| Protein                        | 0.23     | 0.11           | 2.13    |    |       |             |
| Protein <sup>2</sup>           | -0.17    | 0.12           | -1.40   |    |       |             |
| Injury:Protein                 | -0.24    | 0.15           | -1.60   | 2  | 2.52  | 0.28        |
| Infection:Protein              | -0.18    | 0.15           | -1.22   |    |       |             |
| Injury:Protein <sup>2</sup>    | 0.12     | 0.17           | 0.74    | 2  | 0.97  | 0.62        |
| Infection:Protein <sup>2</sup> | 0.17     | 0.17           | 1.00    |    |       |             |

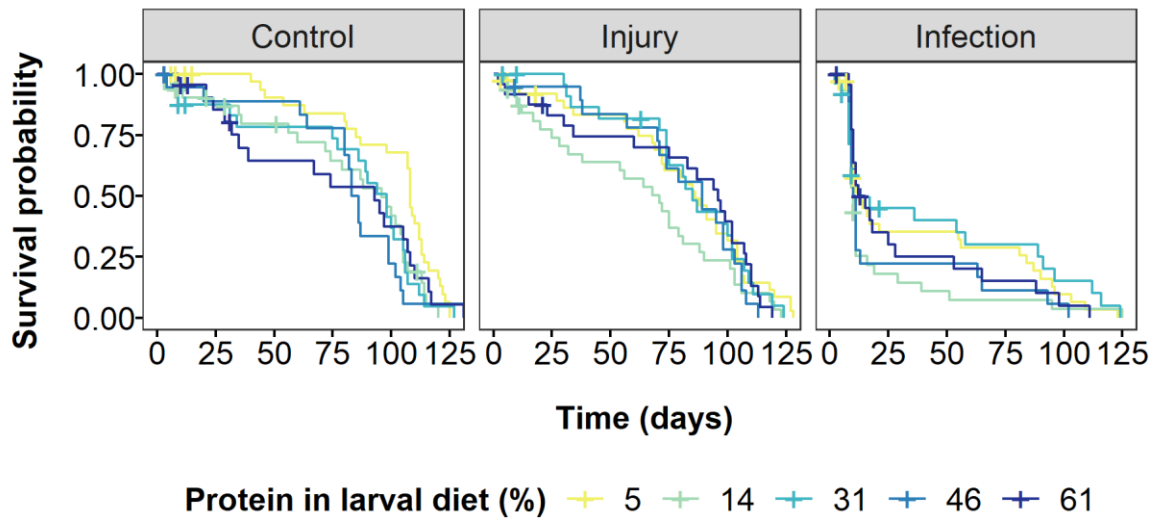

74

75 **Figure S5:** Effects of protein in larval diet on survival of adult flies infected with a bacterial  
 76 pathogen (“Infection”), injured by a pinprick (“Injury”) or with no treatment (“Control”).  
 77 Survival is shown as Kaplan-Meier curves for each stress and diet treatment groups. Plus signs  
 78 (+) indicate censored data points.



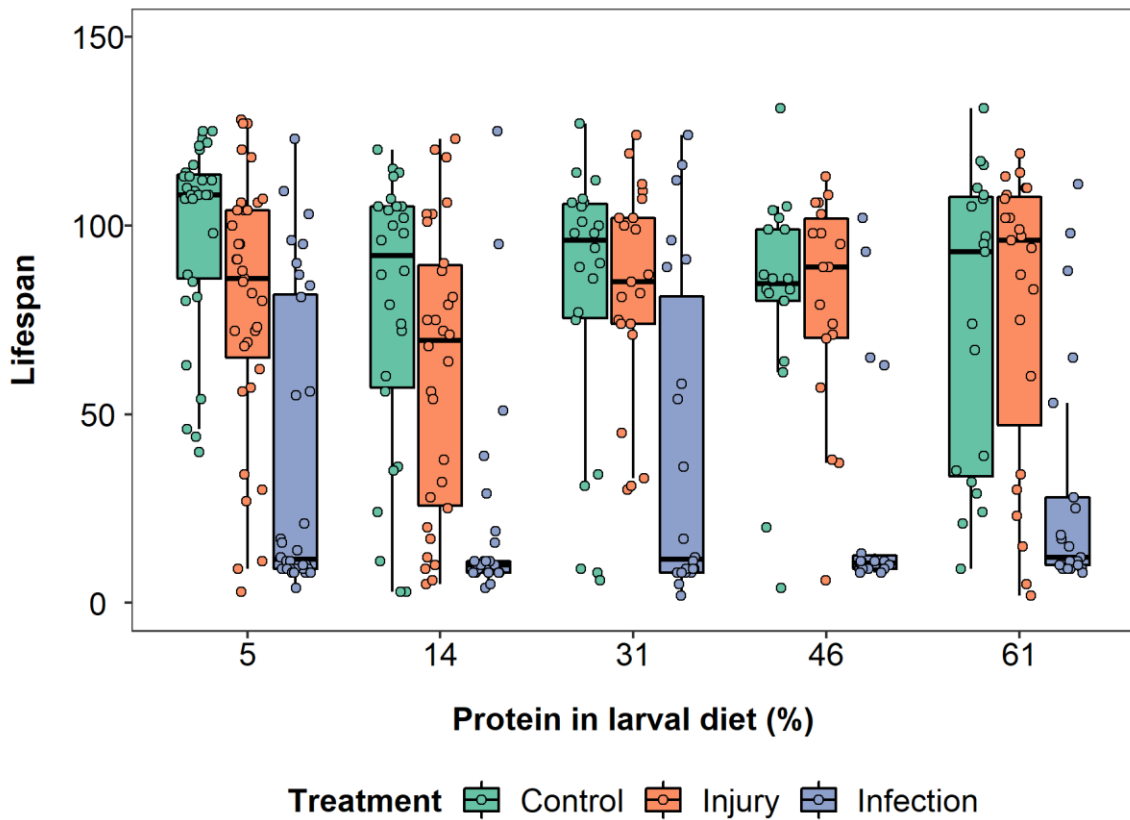

79

80 **Figure S6:** Effects of protein in larval diet on the lifespan of flies infected with a bacterial  
 81 pathogen (blue bars and data points), injured by a pinprick (orange bars and data points) or  
 82 with no treatment (green bars and data points). The lines in the box plots indicates median  
 83 values (50% quantile), boxes are the interquartile range (25% to 75% quantiles) and whiskers  
 84 are minimum or maximum quartiles (25% - 1.5 x interquartile range, 75% + 1.5 x interquartile  
 85 range).

86 **Table S7:** Summary of main effects parameter estimates and associated LRT test values for a  
 87 negative binomial model of the effects of protein in larval diet and stress treatments on lifespan  
 88 of adult flies. The values are from models not including interactions with the specific main  
 89 effect. Chi-squared and associated p-values are from LRT tests comparing a model with no  
 90 interactions associated with the main effect to a model with no main effect. Protein and protein<sup>2</sup>  
 91 are mean centered to standard deviation of 1. Significant results below significance level  $\alpha =$   
 92 0.05 are bolded.

|                            | Estimate     | Standard error | Z value       | Df       | Chisq        | Pr (>Chisq)      |
|----------------------------|--------------|----------------|---------------|----------|--------------|------------------|
| <b>Injury treatment</b>    | <b>-0.10</b> | <b>0.10</b>    | <b>-1.04</b>  | <b>2</b> | <b>99.28</b> | <b>&lt;0.001</b> |
| <b>Infection treatment</b> | <b>-1.00</b> | <b>0.10</b>    | <b>-10.13</b> |          |              |                  |
| Protein                    | -0.02        | 0.04           | -0.59         | 1        | 0.35         | 0.56             |
| Protein <sup>2</sup>       | 0.02         | 0.05           | 0.47          | 1        | 0.22         | 0.64             |

93 **Table S8:** Model summary of a negative binomial model of the effects of protein in larval diet  
 94 and stress treatments on lifespan of adult flies. Protein and protein<sup>2</sup> are mean centered to  
 95 standard deviation of 1.

|                                | Estimate | Standard error | Z value | Df       | Chisq       | Pr (>Chisq) |
|--------------------------------|----------|----------------|---------|----------|-------------|-------------|
| Intercept                      | 4.38     | 0.12           | 37.63   |          |             |             |
| Injury treatment               | -0.06    | 0.16           | -0.40   |          |             |             |
| Infection treatment            | -0.97    | 0.16           | -6.00   |          |             |             |
| Protein                        | -0.10    | 0.08           | -1.22   |          |             |             |
| Protein <sup>2</sup>           | 0.05     | 0.10           | 0.49    |          |             |             |
| Injury:Protein                 | 0.12     | 0.11           | 1.11    | <b>2</b> | <b>1.22</b> | <b>0.54</b> |
| Infection:Protein              | 0.06     | 0.11           | 0.56    |          |             |             |
| Injury:Protein <sup>2</sup>    | -0.04    | 0.13           | -0.28   | <b>2</b> | <b>0.08</b> | <b>0.96</b> |
| Infection:Protein <sup>2</sup> | -0.03    | 0.13           | -0.21   |          |             |             |

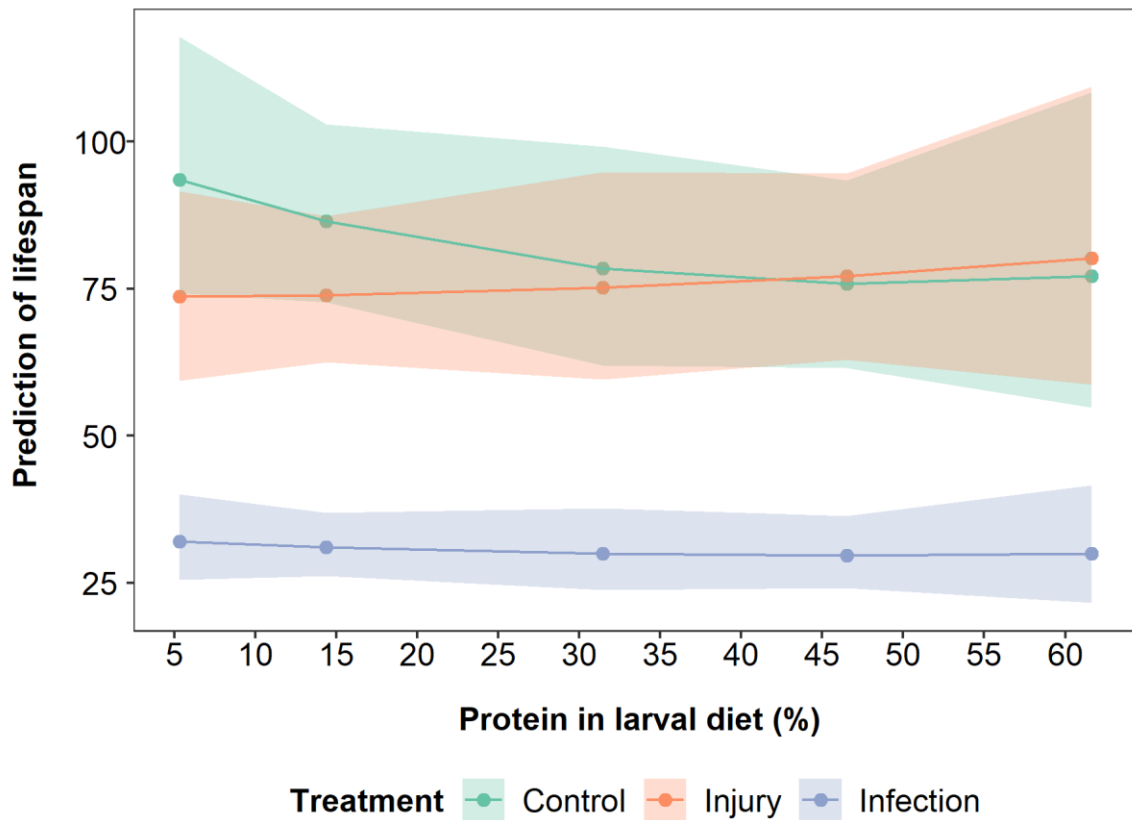

96

97 **Figure S7:** Model predictions of the effects of larval protein restriction on adult lifespan of  
 98 flies infected with a bacterial pathogen (blue data points and lines), injured by a pinprick  
 99 (orange data points and lines) or with no treatment (green data points and lines). Shaded areas  
 100 are 95% confidence intervals.

101 **Table S9:** Model summary of a Cox Proportional Hazard regression model of the effects of  
 102 protein in larval diet and stress treatments on survival (n = 407, number of deaths = 365,  
 103 concordance = 0.672,  $R^2 = 0.18$ ). Protein and protein<sup>2</sup> are mean centered to standard deviation  
 104 of 1. Significant results below significance level  $\alpha = 0.05$  are bolded.

|                                | coef        | exp(coef)   | se(coef)    | z           | Pr (> z )        |
|--------------------------------|-------------|-------------|-------------|-------------|------------------|
| Injury treatment               | 1.15        | 1.15        | 0.21        | 0.67        | 0.50             |
| <b>Infection treatment</b>     | <b>0.92</b> | <b>2.50</b> | <b>0.21</b> | <b>4.32</b> | <b>&lt;0.001</b> |
| Protein                        | 0.20        | 1.22        | 0.11        | 1.82        | 0.07             |
| Protein <sup>2</sup>           | -0.19       | 0.83        | 0.12        | -1.54       | 0.12             |
| Injury:Protein                 | -0.16       | 0.86        | 0.15        | -1.03       | 0.30             |
| Infection:Protein              | -0.17       | 0.84        | 0.15        | -1.11       | 0.27             |
| Injury:Protein <sup>2</sup>    | 0.11        | 1.11        | 0.17        | 0.63        | 0.53             |
| Infection:Protein <sup>2</sup> | 0.25        | 1.29        | 0.17        | 1.48        | 0.14             |

105

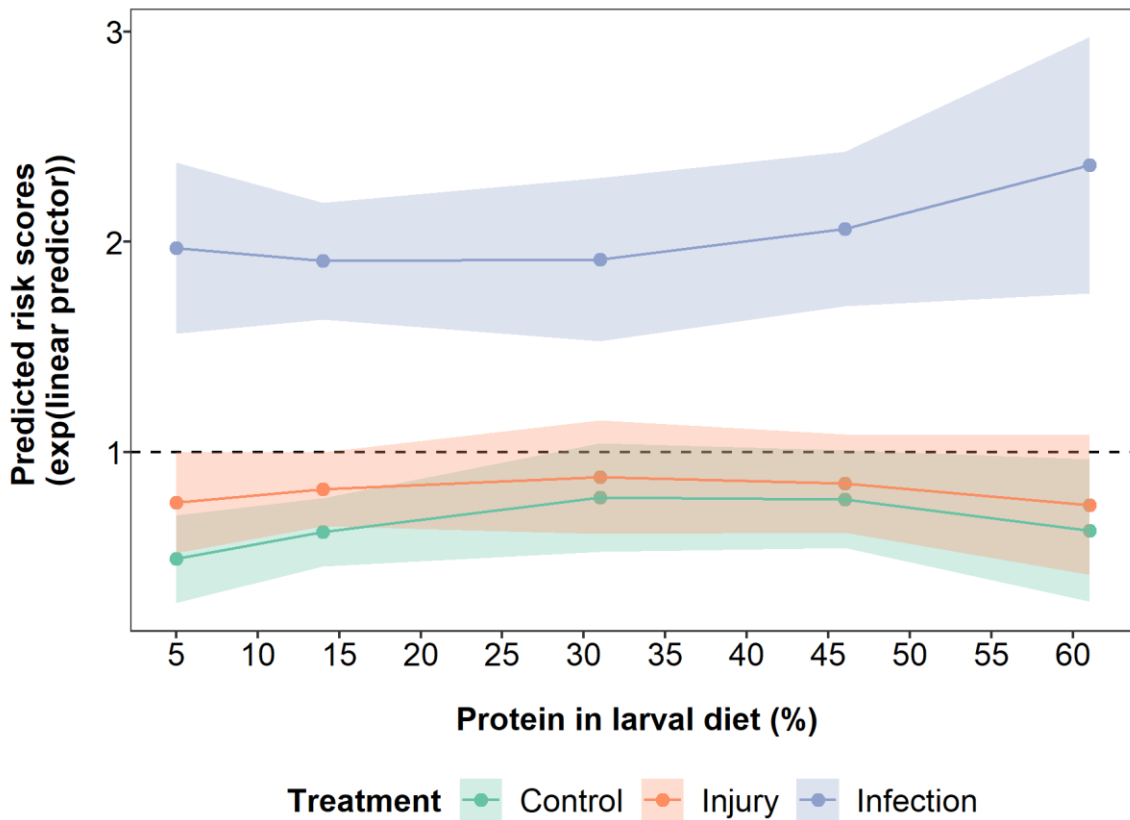

106

107 **Figure S8:** Model predictions of the effects of larval protein restriction on survival of flies  
 108 infected with a bacterial pathogen (blue data points and lines), injured by a pinprick (orange  
 109 data points and lines) or with no treatment (green data points and lines).  $y = 1$  line shows no  
 110 change in risk ratio, i.e. treatment would have no effect compared to baseline hazard. Shaded  
 111 areas are 95% confidence intervals.

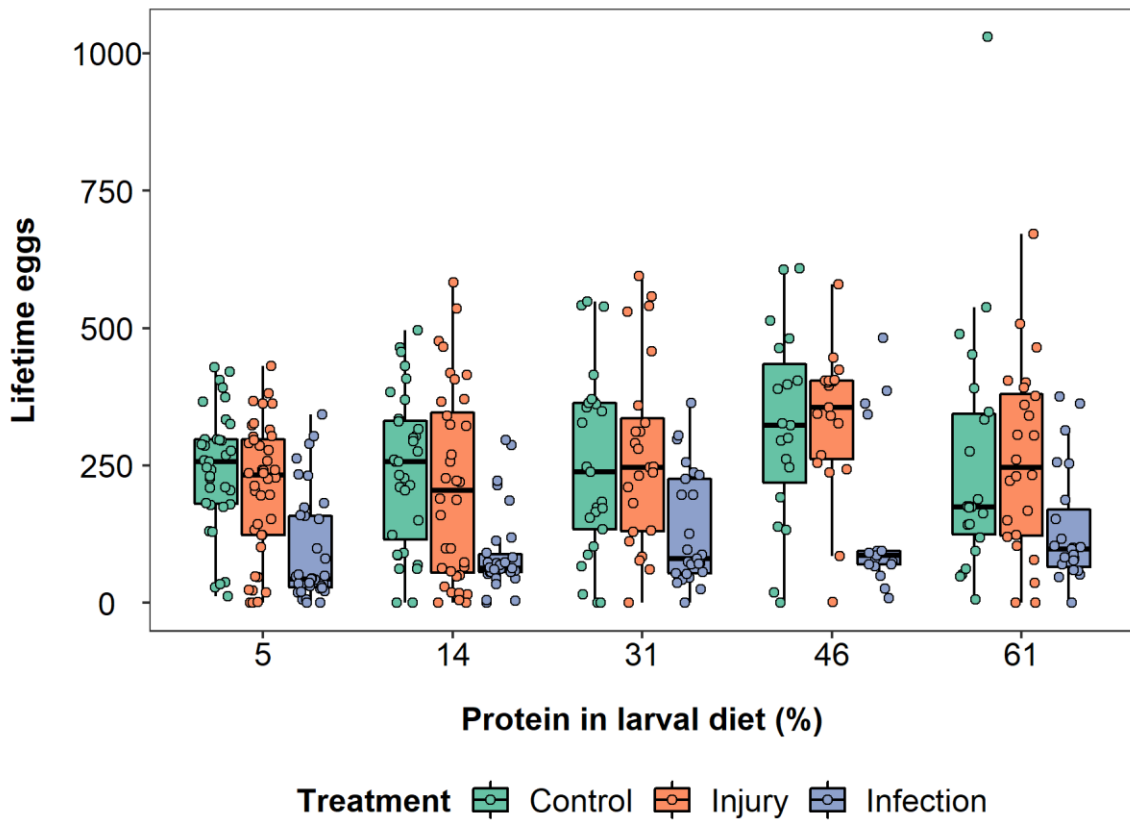

112

113 **Figure S9:** Effects of protein in larval diet on the lifetime eggs produced per female (up to day  
 114 98) of flies infected with a bacterial pathogen (blue data points and lines), injured by a pinprick  
 115 (orange data points and lines) or with no treatment (green data points and lines). The lines in  
 116 the box plots indicates median values (50% quantile), boxes are the interquartile range (25%  
 117 to 75% quantiles) and whiskers are minimum or maximum quartiles (25% - 1.5 x interquartile  
 118 range, 75% + 1.5 x interquartile range).

119 **Table S10:** Summary of main effects parameter estimates and associated LRT test values for  
 120 a zero-inflated negative binomial model of the effects of protein in larval diet and stress  
 121 treatments on the total number of eggs produced per fly with lifespan added as a term in the  
 122 model. The values are from models not including interactions with the specific main effect.  
 123 Chi-squared and associated p-values are from LRT tests comparing a model with no  
 124 interactions associated with the main effect to a model with no main effect. Protein protein<sup>2</sup>  
 125 and lifespan are mean centered to standard deviation of 1. Significant results below significance  
 126 level  $\alpha = 0.05$  are bolded.

|                            | Estimate     | Standard error | Z value      | Df       | Chisq       | Pr (>Chisq)  |
|----------------------------|--------------|----------------|--------------|----------|-------------|--------------|
| <b>Injury treatment</b>    | <b>0.04</b>  | <b>0.07</b>    | <b>0.63</b>  | <b>2</b> | <b>8.81</b> | <b>0.01</b>  |
| <b>Infection treatment</b> | <b>-0.18</b> | <b>0.08</b>    | <b>-2.30</b> |          |             |              |
| <b>Protein</b>             | <b>0.11</b>  | <b>0.05</b>    | <b>2.45</b>  | <b>1</b> | <b>5.73</b> | <b>0.02</b>  |
| <b>Protein<sup>2</sup></b> | <b>-0.11</b> | <b>0.04</b>    | <b>-3.04</b> | <b>1</b> | <b>8.01</b> | <b>0.005</b> |

127 **Table S11:** Model summary of a zero-inflated negative binomial model of the effects of protein  
 128 in larval diet and stress treatments on the total number of eggs produced per fly. Block and  
 129 individual ID are added as random effects. Lifespan is added in the model to account for  
 130 selective disappearance. Protein protein<sup>2</sup> and lifespan are mean centered to standard deviation  
 131 of 1. Significant results below significance level  $\alpha = 0.05$  are bolded.

|                             | Estimate    | Standard error | Z value      | Df       | Chisq         | Pr (>Chisq)      |
|-----------------------------|-------------|----------------|--------------|----------|---------------|------------------|
| Intercept                   | 5.27        | 0.08           | 64.23        |          |               |                  |
| Injury treatment            | 0.06        | 0.11           | 0.54         |          |               |                  |
| Infection treatment         | -0.17       | 0.12           | -1.41        |          |               |                  |
| Protein                     | 0.18        | 0.06           | 3.10         |          |               |                  |
| Protein <sup>2</sup>        | -0.10       | 0.07           | -1.60        |          |               |                  |
| <b>Lifespan</b>             | <b>0.69</b> | <b>0.04</b>    | <b>19.78</b> | <b>1</b> | <b>275.77</b> | <b>&lt;0.001</b> |
| Injury:Protein              | -0.02       | 0.08           | -0.29        | <b>2</b> | 2.39          | 0.30             |
| Infection:Protein           | 0.10        | 0.08           | 1.18         |          |               |                  |
| Injury:Protein <sup>2</sup> | -0.02       | 0.09           | -0.24        | <b>2</b> | 0.06          | 0.97             |

132

133 **Table S12:** Summary of main effects parameter estimates and associated LRT test values for  
 134 a zero-inflated negative binomial model of the effects of protein in larval diet and stress  
 135 treatments on the total number of eggs produced per fly. The values are from models not  
 136 including interactions with the specific main effect. Chi-squared and associated p-values are  
 137 from LRT tests comparing a model with no interactions associated with the main effect to a  
 138 model with no main effect. Protein protein<sup>2</sup> and lifespan are mean centered to standard  
 139 deviation of 1. Significant results below significance level  $\alpha = 0.05$  are bolded.

|                            | Estimate     | Standard error | Z value      | Df       | Chisq        | Pr (>Chisq)      |
|----------------------------|--------------|----------------|--------------|----------|--------------|------------------|
| <b>Injury treatment</b>    | <b>-0.04</b> | <b>0.09</b>    | <b>-0.48</b> | <b>2</b> | <b>80.68</b> | <b>&lt;0.001</b> |
| <b>Infection treatment</b> | <b>-0.82</b> | <b>0.09</b>    | <b>-8.82</b> |          |              |                  |
| <b>Protein</b>             | <b>0.12</b>  | <b>0.04</b>    | <b>3.15</b>  | <b>1</b> | <b>5.91</b>  | <b>0.02</b>      |
| Protein <sup>2</sup>       | -0.07        | 0.05           | -1.45        | 1        | 2.10         | 0.15             |

140 **Table S13:** Model summary of a zero-inflated negative binomial model of the effects of protein  
 141 in larval diet and stress treatments on the total number of eggs produced per fly. Block and  
 142 individual ID are added as random effects. Protein protein<sup>2</sup> and lifespan are mean centered to  
 143 standard deviation of 1. Significant results below significance level  $\alpha = 0.05$  are bolded.

|                                | Estimate | Standard error | Z value | Df       | Chisq       | Pr (>Chisq) |
|--------------------------------|----------|----------------|---------|----------|-------------|-------------|
| Intercept                      | 5.67     | 0.11           | 50.99   |          |             |             |
| Injury treatment               | -0.05    | 0.16           | -0.32   |          |             |             |
| Infection treatment            | -0.86    | 0.16           | -5.54   |          |             |             |
| Protein                        | 0.09     | 0.08           | 1.21    |          |             |             |
| Protein <sup>2</sup>           | -0.09    | 0.09           | -0.99   |          |             |             |
| Injury:Protein                 | 0.08     | 0.11           | 0.75    | <b>2</b> | <b>0.98</b> | <b>0.61</b> |
| Infection:Protein              | 0.10     | 0.11           | 0.93    |          |             |             |
| Injury:Protein <sup>2</sup>    | 0.01     | 0.13           | 0.07    | <b>2</b> | <b>0.10</b> | <b>0.95</b> |
| Infection:Protein <sup>2</sup> | 0.04     | 0.13           | 0.29    |          |             |             |
| Infection:Protein <sup>2</sup> | -0.01    | 0.09           | -0.08   |          |             |             |



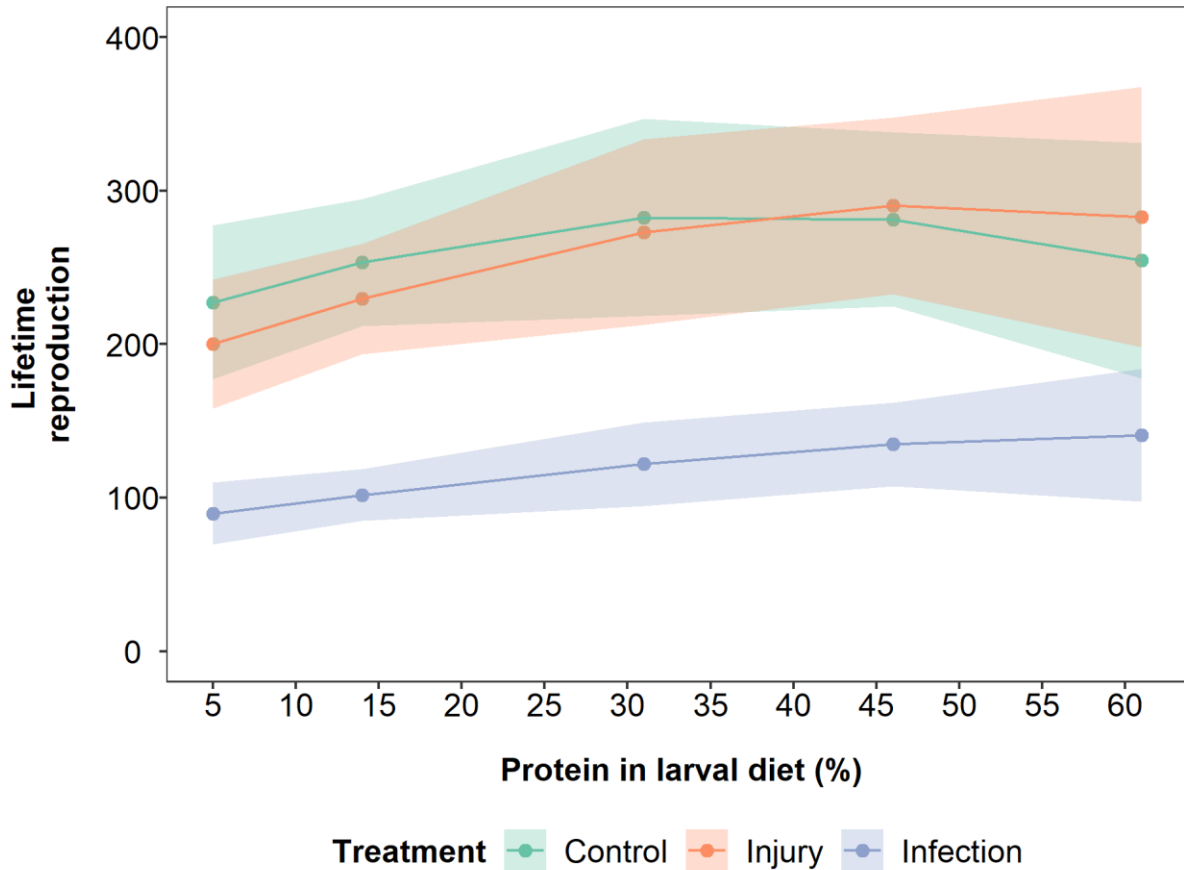

145

146 **Figure S10:** Model predictions of the effects of larval protein restriction on lifetime egg  
 147 production (up to day 98) of flies infected with a bacterial pathogen (blue data points and lines),  
 148 injured by a pinprick (orange data points and lines) or with no treatment (green data points and  
 149 lines). Shaded areas are 95% confidence intervals.

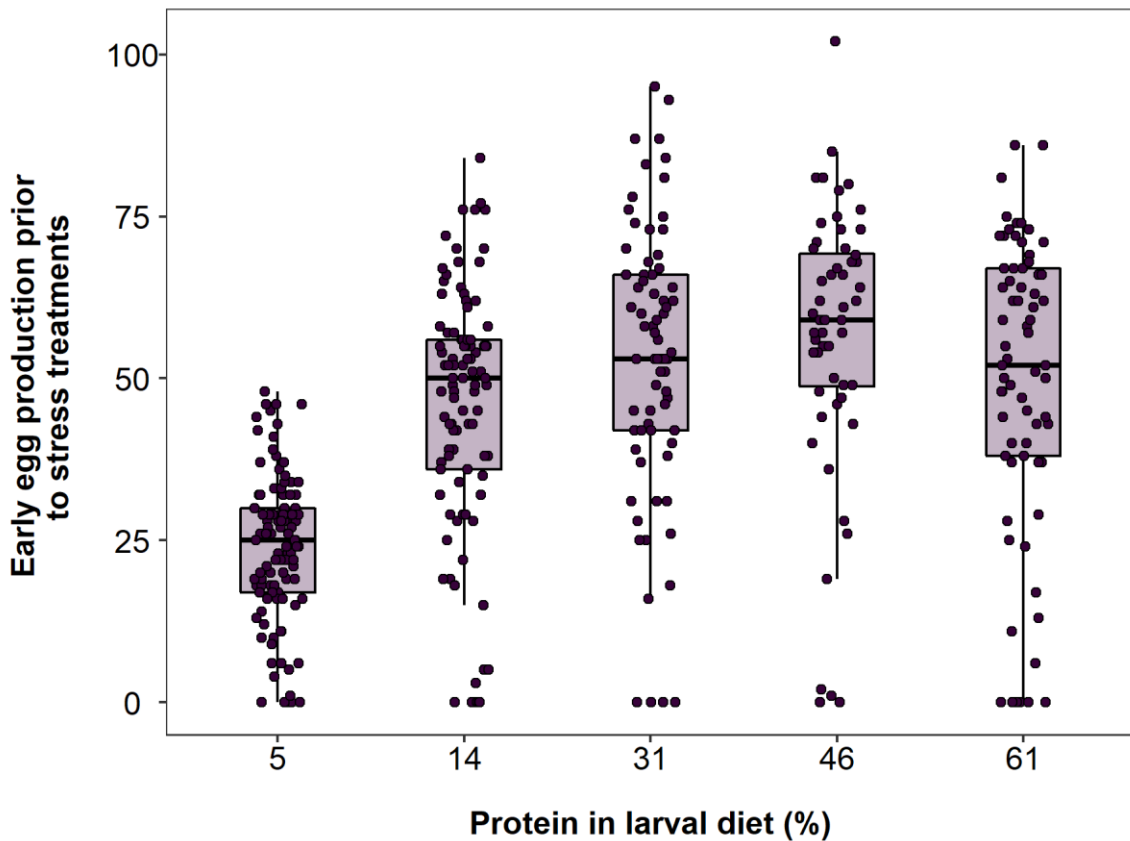

150

151 **Figure S11:** Effects of protein in larval diet on the number of eggs produced in the first week  
 152 before stress treatments. The lines in the box plots indicate median values (50% quantile),  
 153 boxes are the interquartile range (25% to 75% quantiles) and whiskers are minimum or  
 154 maximum quartiles (25% - 1.5 x interquartile range, 75% + 1.5 x interquartile range).

155 **Table S14:** Model summary of a zero-inflated negative binomial model of the effects of protein  
 156 in larval diet and stress treatments on the total number of eggs produced per fly in the first  
 157 week. Block and individual ID are added as random effects. Protein protein<sup>2</sup> and lifespan are  
 158 mean centered to standard deviation of 1. Significant results below significance level  $\alpha = 0.05$   
 159 are bolded.

|                            | Estimate     | Standard error | Z value      | Df       | Chisq        | Pr (>Chisq)      |
|----------------------------|--------------|----------------|--------------|----------|--------------|------------------|
| Intercept                  | 3.97         | 0.08           | 48.60        |          |              |                  |
| Protein                    | 0.29         | 0.06           | 5.22         | 1        | 3.71         | 0.054            |
| <b>Protein<sup>2</sup></b> | <b>-0.20</b> | <b>0.04</b>    | <b>-4.77</b> | <b>1</b> | <b>22.19</b> | <b>&lt;0.001</b> |

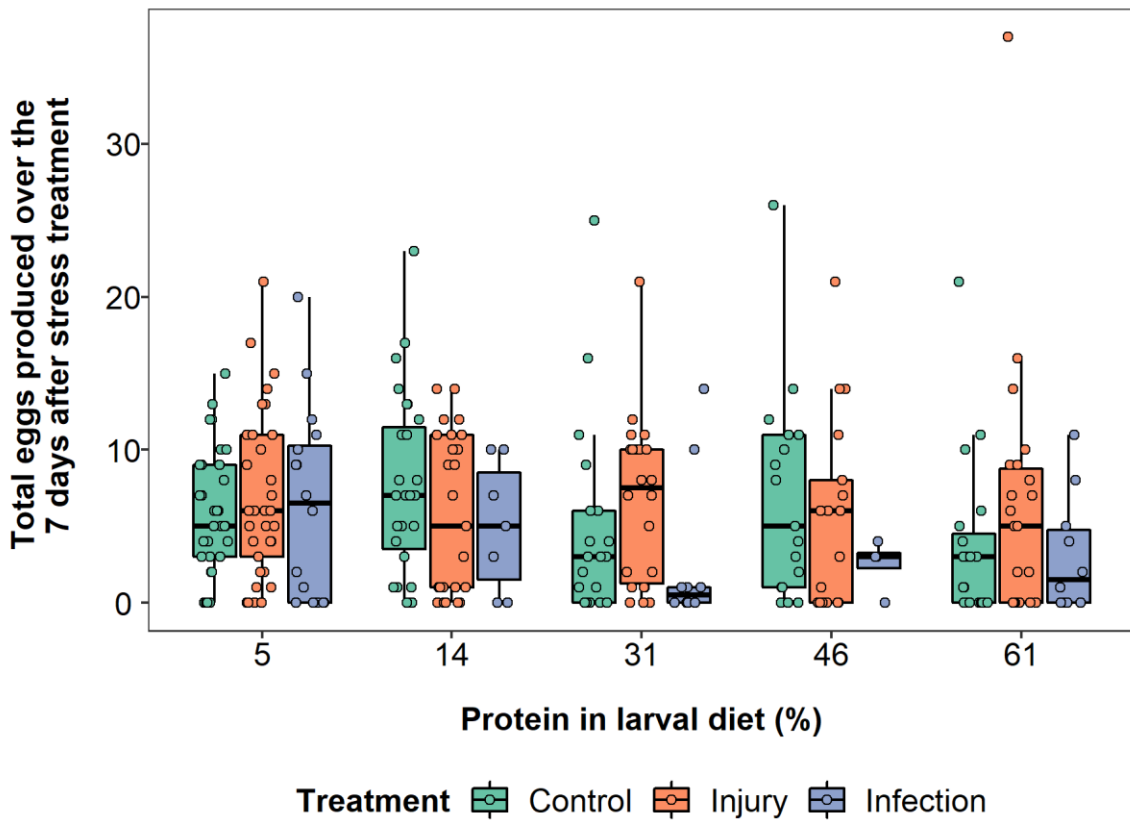

160

161 **Figure S12:** Effects of protein in larval diet on total eggs produced over seven days after stress  
 162 treatment by flies infected with a bacterial pathogen (blue data points and bars), injured by a  
 163 pinprick (orange data points and bars) or with no treatment (green data points and bars). The  
 164 lines in the box plots indicate median values (50% quantile), boxes are the interquartile range  
 165 (25% to 75% quantiles) and whiskers are minimum or maximum quartiles (25% - 1.5 x  
 166 interquartile range, 75% + 1.5 x interquartile range).

167 **Table S15:** Summary of main effects parameter estimates and associated LRT test values for  
 168 a negative binomial model of the effects of protein in larval diet and stress treatments on the  
 169 total number of eggs produced per fly seven days after stress treatments. The values are from  
 170 models not including interactions with the specific main effect. Chi-squared and associated p-  
 171 values are from LRT tests comparing a model with no interactions associated with the main  
 172 effect to a model with no main effect. Protein and protein<sup>2</sup> are mean centered to standard  
 173 deviation of 1.

|                      | Estimate | Standard error | Z value | Df | Chisq | Pr (>Chisq) |
|----------------------|----------|----------------|---------|----|-------|-------------|
| Injury treatment     | 0.12     | 0.12           | 0.99    | 2  | 2.36  | 0.31        |
| Infection treatment  | -0.13    | 0.18           | -0.74   |    |       |             |
| Protein              | -0.05    | 0.06           | -0.76   | 1  | 0.59  | 0.44        |
| Protein <sup>2</sup> | 0.003    | 0.08           | 0.04    | 1  | 0.002 | 0.97        |

174

175 **Table S16:** Model summary of a negative binomial model of the effects of protein in larval  
 176 diet and stress treatments on the total number of eggs produced per fly seven days after stress  
 177 treatments. Block and individual ID are added as random effects. Protein protein<sup>2</sup> and lifespan  
 178 are mean centered to standard deviation of 1. Block variance = 0.001, standard deviation =  
 179 0.02.

|                                | Estimate | Standard error | Z value | Df | Chisq | Pr (> t ) |
|--------------------------------|----------|----------------|---------|----|-------|-----------|
| Intercept                      | 2.08     | 0.14           | 14.37   |    |       |           |
| Injury treatment               | -0.07    | 0.20           | -0.35   |    |       |           |
| Infection treatment            | -0.62    | 0.34           | -1.79   |    |       |           |
| Protein                        | -0.02    | 0.10           | -0.15   |    |       |           |
| Protein <sup>2</sup>           | 0.14     | 0.13           | -1.09   |    |       |           |
| Injury:Protein                 | 0.06     | 0.14           | 0.43    | 2  | 5.57  | 0.06      |
| Infection:Protein              | -0.40    | 0.20           | -1.97   |    |       |           |
| Injury:Protein <sup>2</sup>    | 0.20     | 0.17           | 1.19    | 2  | 2.73  | 0.26      |
| Infection:Protein <sup>2</sup> | 0.39     | 0.25           | 1.52    |    |       |           |

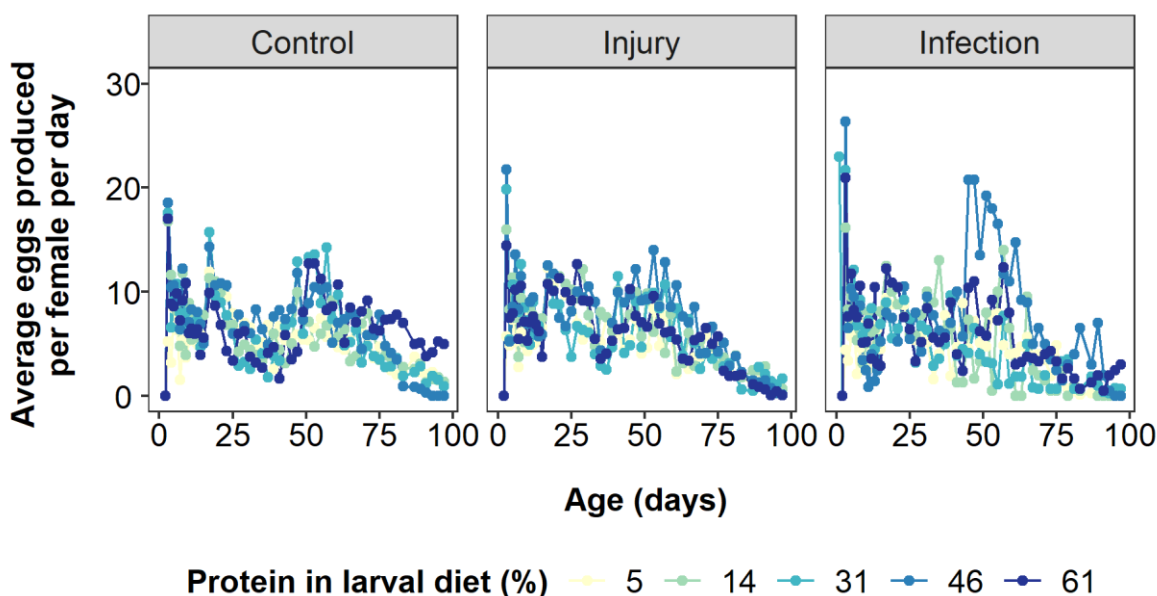

180  
 181 **Figure S13:** Average eggs per day for each stress and larval diet treatments on flies infected  
 182 with a bacterial pathogen (“Infection”), injured by a pinprick (“Injury”) or with no treatment  
 183 (“Control”). For clarity, associated errors have been removed from the plot.

184 **Table S17:** Summary of main effects parameter estimates and associated LRT test values for  
 185 a zero-inflated negative binomial model of the effects of protein in larval diet and stress  
 186 treatments on the daily number of eggs produced per fly. The values are from models not  
 187 including interactions with the specific main effect. Chi-squared and associated p-values are  
 188 from LRT tests comparing a model with no interactions associated with the main effect to a  
 189 model with no main effect. Protein and protein<sup>2</sup> are mean centered to standard deviation of 1.  
 190 Significant results below significance level  $\alpha = 0.05$  are bolded.

|                            | Estimate     | Standard error | Z value       | Df       | Chisq         | Pr (>Chisq)      |
|----------------------------|--------------|----------------|---------------|----------|---------------|------------------|
| Injury treatment           | -0.02        | 0.04           | -0.56         | 2        | 0.36          | 0.84             |
| Infection treatment        | -0.02        | 0.05           | -0.44         |          |               |                  |
| Protein                    | 0.02         | 0.03           | 0.78          | 1        | 0.61          | 0.44             |
| <b>Protein<sup>2</sup></b> | <b>-0.12</b> | <b>0.03</b>    | <b>-4.05</b>  | <b>1</b> | <b>12.26</b>  | <b>0.0005</b>    |
| <b>Age</b>                 | <b>-0.59</b> | <b>0.01</b>    | <b>-47.22</b> | <b>1</b> | <b>2175.5</b> | <b>&lt;0.001</b> |
| <b>Age2</b>                | <b>-0.07</b> | <b>0.01</b>    | <b>-5.13</b>  | <b>1</b> | <b>26.14</b>  | <b>&lt;0.001</b> |

191 **Table S18:** Summary of two-way interaction estimates and associated LRT test values for a  
 192 zero-inflated negative binomial model of the effects of protein in larval diet and stress  
 193 treatments on the daily number of eggs produced per fly. The values are from models not  
 194 including interactions with the specific main effect. Chi-squared and associated p-values are  
 195 from LRT tests comparing a model with no interactions associated with the main effect to a  
 196 model with no main effect. Protein and protein<sup>2</sup> are mean centered to standard deviation of 1.  
 197 Significant results below significance level  $\alpha = 0.05$  are bolded.

|                                | Estimate     | Standard error | Z value      | Df       | Chisq        | Pr (>Chisq)      |
|--------------------------------|--------------|----------------|--------------|----------|--------------|------------------|
| <b>Protein:Age</b>             | <b>-0.07</b> | <b>0.01</b>    | <b>-5.52</b> | <b>1</b> | <b>30.48</b> | <b>&lt;0.001</b> |
| <b>Protein:Age2</b>            | <b>0.07</b>  | <b>0.01</b>    | <b>4.88</b>  | <b>1</b> | <b>23.94</b> | <b>&lt;0.001</b> |
| <b>Protein<sup>2</sup>:Age</b> | <b>0.07</b>  | <b>0.02</b>    | <b>4.76</b>  | <b>1</b> | <b>22.62</b> | <b>&lt;0.001</b> |

198

199 **Table S19:** Model summary of a zero-inflated negative binomial model of the effects of protein  
200 in larval diet and stress treatments on the daily number of eggs produced per fly. Lifetime egg  
201 counts go up to day 98. Block, individual ID and a value for each row are added as random  
202 effects. Protein, protein<sup>2</sup>, age, age<sup>2</sup> and lifespan are mean centered to standard deviation of 1.  
203 Significant results below significance level  $\alpha = 0.05$  are bolded.

|                                          | Estimate      | Standard error | Z value      | Df       | Chisq        | Pr (>Chisq)      |
|------------------------------------------|---------------|----------------|--------------|----------|--------------|------------------|
| Intercept                                | 1.71          | 0.07           | 26.14        |          |              |                  |
| Injury treatment                         | 0.08          | 0.08           | 1.06         |          |              |                  |
| Infection treatment                      | -0.09         | 0.10           | -0.86        |          |              |                  |
| Protein                                  | 0.02          | 0.05           | 0.41         |          |              |                  |
| Protein <sup>2</sup>                     | -0.05         | 0.05           | -1.13        |          |              |                  |
| Age                                      | -0.60         | 0.03           | -21.74       |          |              |                  |
| Age <sup>2</sup>                         | -0.03         | 0.02           | -1.63        |          |              |                  |
| Lifespan                                 | 0.02          | 0.02           | 1.41         | 1        | 2.00         | 0.16             |
| Injury:Protein                           | 0.07          | 0.06           | 1.17         | 2        | 1.61         | 0.45             |
| Infection:Protein                        | 0.002         | 0.07           | 0.03         |          |              |                  |
| Injury:Protein <sup>2</sup>              | -0.09         | 0.06           | -1.54        | 2        | 2.66         | 0.26             |
| Infection:Protein <sup>2</sup>           | -0.01         | 0.07           | -0.15        |          |              |                  |
| <b>Injury:Age</b>                        | <b>-0.05</b>  | <b>0.04</b>    | <b>-1.18</b> | <b>2</b> | <b>18.05</b> | <b>&lt;0.001</b> |
| <b>Infection:Age</b>                     | <b>-0.25</b>  | <b>0.06</b>    | <b>-4.27</b> |          |              |                  |
| Injury:Age <sup>2</sup>                  | 0.07          | 0.03           | -2.30        | 2        | 5.90         | 0.052            |
| Infection:Age <sup>2</sup>               | -0.06         | 0.04           | -1.50        |          |              |                  |
| Protein:Age                              | -0.10         | 0.02           | -4.86        |          |              |                  |
| Protein:Age <sup>2</sup>                 | 0.10          | 0.02           | 4.24         |          |              |                  |
| Protein <sup>2</sup> :Age                | 0.12          | 0.02           | 5.10         |          |              |                  |
| Injury:Protein:Age                       | 0.05          | 0.03           | 1.64         | 2        | 2.75         | 0.25             |
| Infection:Protein:Age                    | 0.03          | 0.04           | 0.82         |          |              |                  |
| <b>Injury:Protein:Age<sup>2</sup></b>    | <b>-0.08</b>  | <b>0.03</b>    | <b>-2.54</b> | <b>2</b> | <b>14.41</b> | <b>0.001</b>     |
| <b>Infection:Protein:Age<sup>2</sup></b> | <b>0.08</b>   | <b>0.04</b>    | <b>1.75</b>  |          |              |                  |
| <b>Injury:Protein<sup>2</sup>:Age</b>    | <b>-0.10</b>  | <b>0.03</b>    | <b>-3.18</b> | <b>2</b> | <b>11.21</b> | <b>0.004</b>     |
| <b>Infection:Protein<sup>2</sup>:Age</b> | <b>-0.003</b> | <b>0.05</b>    | <b>-0.07</b> |          |              |                  |
